1 **Combining Digital Imaging and Genome Wide Association Mapping**  
2 **to Dissect Uncharacterized Traits in Plant/Pathogen Interactions**

3 **Rachel F. Fordyce<sup>1</sup>, Nicole E. Soltis<sup>1</sup>, Celine Caseys<sup>1</sup>, Raoni Gwinner<sup>1</sup>, Jason A. Corwin<sup>1,2</sup>,**  
4 **Susana Atwell<sup>1</sup>, Daniel Copeland<sup>1</sup>, Julie Feusier<sup>1</sup>, Anushriya Subedy<sup>1</sup>, Robert Eshbaugh<sup>1</sup>, and**  
5 **Daniel J. Kliebenstein<sup>1,3\*</sup>**

6 <sup>1</sup>Department of Plant Sciences, University of California, Davis, One Shields Avenue, Davis, CA,  
7 95616, USA

8 <sup>2</sup>Department of Ecology and Evolutionary Biology, University of Colorado, Boulder, 1900  
9 Pleasant Street, Boulder, CO, 80309-0334, USA

10 <sup>3</sup>DynaMo Center of Excellence, University of Copenhagen, Thorvaldsensvej 40, DK-1871,  
11 Frederiksberg C, Denmark

12 **\*Correspondence:** Daniel J. Kliebenstein, Department of Plant Sciences, University of California,  
13 Davis, One Shields Ave, Davis, CA, 95616, USA.

14 [Kliebenstein@ucdavis.edu](mailto:Kliebenstein@ucdavis.edu)

15 **Short Title: Digital Lesion Genetics**

16 **Summary: Digital imaging allows the identification of genes controlling novel lesion traits.**

17 **Keywords: Plant-pathogen interaction, *Arabidopsis thaliana*, *Botrytis cinerea*, GWAS.**

18

19 **Abstract**

20 Plant resistance to generalist pathogens with broad host ranges, such as *Botrytis cinerea*, is  
21 typically quantitative and highly polygenic. Recent studies have begun to elucidate the  
22 molecular genetic basis underpinning plant-pathogen interactions using commonly measured  
23 traits including lesion size and/or pathogen biomass. Yet with the advent of digital imaging and  
24 phenomics, there are a large number of additional resistance traits available to study  
25 quantitative resistance. In this study, we used high-throughput digital imaging analysis to  
26 investigate previously uncharacterized visual traits of plant-pathogen interactions related  
27 disease resistance using the *Arabidopsis thaliana/Botrytis cinerea* pathosystem. Using a large  
28 collection of 75 visual traits collected from every lesion, we focused on lesion color, lesion  
29 shape, and lesion size, to test how these aspects of the interaction are genetically related. Using  
30 genome wide association (GWA) mapping in *A. thaliana*, we show that lesion color and shape  
31 are genetically separable traits associated with plant-disease resistance. Using defined mutants  
32 in 23 candidate genes from the GWA mapping, we could identify and show that novel loci  
33 associated with each different plant-pathogen interaction trait, which expands our  
34 understanding of the functional mechanisms driving plant disease resistance.

35

36

## 37 **Introduction**

38           The ability to resist biotic attackers, including plant pathogens, is central to a plant's  
39 survival and fitness. This need for resistance is complicated by the immense variety of infection  
40 strategies and pathogenic species that can attack an individual plant. These pathogens differ in  
41 their lifestyle and host range with each having a different requisite optimal virulence  
42 mechanism. Specialist pathogens often co-evolve with host plants to develop virulence  
43 strategies targeted on a specific resistance mechanisms within the plant. These biotrophic  
44 pathogens must strike a delicate balance between keeping host plant's cells alive by while  
45 absorbing nutrients and avoiding detection and suppressing plant defenses. Plant defense  
46 against specialists is accordingly tailored to the specific pathogen with which it has been co-  
47 evolving, often involving gene products that directly or indirectly recognize effectors or  
48 molecular patterns specific to that pathogen. This co-evolutionary link between host and  
49 specialist pathogen frequently leads to large-effect, gene-for-gene resistance involving the  
50 specific pathogen recognition R-genes (Jones and Dangl, 2006). In contrast, necrotrophic  
51 pathogens are often generalists, deploying a diverse array of virulence mechanisms to precisely  
52 kill host plant cells (Laluk and Mengiste, 2010). The generalist attack is multifaceted, relying on  
53 many different phytotoxins and enzymes working in parallel to subjugate the plant. Host-  
54 pathogen co-evolution in generalist pathogens is not well understood because the pathogen  
55 can attack innumerable hosts, causing myriad plant species to encounter a similarly dizzying  
56 array of generalist pathogen virulence mechanisms. As such, generalist necrotrophic resistance  
57 typically has a highly quantitative polygenic basis that involves physical barriers, such cuticle  
58 formation and cell wall modification, chemical barriers, such as secondary metabolites or  
59 reactive oxygen species, and inducible defenses (Rowe and Kliebenstein, 2008; Laluk and  
60 Mengiste, 2010; Windram et al., 2012; Corwin et al., 2016b).

61

62           Infected plants display a large variety of interrelated traits during the infection process.  
63 The abundance of scientific literature concerning molecular mechanistic analysis of plant-  
64 pathogen interactions largely relies either on lesion size (a single number measuring the plant  
65 area displaying symptoms) or pathogen biomass within the infected plant tissue. While these

66 observations are relatively easily measured traits that reflect plant susceptibility to a pathogen,  
67 they do not fully describe all aspects of disease resistance within the plant host. For instance,  
68 comparing the molecular and quantitative genetic basis of resistance using lesion size versus  
69 the underlying biochemical plant resistance responses has shown that different genes can  
70 contribute to these traits. This suggests that the lesion size measurements are not providing the  
71 full picture of the resistance response (Rowe and Kliebenstein, 2008; Bock et al., 2010; Li et al.,  
72 2015; Corwin et al., 2016b; Schwanck and Del Ponte, 2016; Barbedo, 2017; Matsunaga et al.,  
73 2017). There has been recent interest in extending our understanding of plant-pathogen  
74 resistance by conducting more extensive phenotyping of disease symptoms, including  
75 hyperspectral imaging of lesions that records spectra from the visible into the infrared range  
76 (Montes et al., 2007; Kuska et al., 2015; Mutka and Bart, 2015; Leucker et al., 2016). This  
77 analysis has differentiated between diseases on the same plant through biochemical responses  
78 using light spectra from 400nm to 1000nm (Mahlein et al., 2012). These spectra provide a blend  
79 of visual symptoms characterized not only by extent of necrosis, but also by water content,  
80 pigment modification, tissue function, and appearance of fungal structures (Mahlein et al.,  
81 2012). However, the molecular mechanisms controlling these visual and biochemical aspects of  
82 the plant-pathogen interaction are largely unstudied, and little is known about their  
83 mechanistic basis and how this relates to molecular mechanisms identified using pathogen  
84 biomass or lesion size. Therefore, there is a need to study plant-pathogen interactions from the  
85 multi-dimensional view that can be provided by digital imaging of lesions and assess how this  
86 links to one-dimensional measurement of lesion progression. This could discover new insights  
87 into the physiology of pathogen strategy and host response.

88

89 One developing model system to directly study the complexity of molecular plant  
90 resistance to generalist pathogens can be found within the *Arabidopsis thaliana/Botrytis*  
91 *cinerea* pathosystem (Corwin and Kliebenstein, 2017). *Botrytis cinerea* is a generalist  
92 necrotrophic pathogen with a broad range of hosts that includes Bryophytes, through  
93 Gymnosperms, to Angiosperms (Jarvis, 1977; Staats et al., 2005; Choquer et al., 2007; Elad et  
94 al., 2016). This host range appears to be facilitated by a high level of intraspecific genetic

95 diversity and elevated levels of recombination in comparison to specialist clonal pathogens  
96 (Giraud et al., 1997; Alfonso et al., 2000; Vaczy et al., 2008; Kretschmer et al., 2009; Stefanato  
97 et al., 2009; Amselem et al., 2011; Aguilera et al., 2012; Atwell et al., 2015). This natural genetic  
98 variation within *B. cinerea* quantitatively affects lesion size within all plants tested, including *A.*  
99 *thaliana* (Rowe and Kliebenstein, 2010; Valiuskaite et al., 2010; Amselem et al., 2011; Corwin et  
100 al., 2016a). *A. thaliana* resistance to *B. cinerea* involves key signaling pathways, such as  
101 Jasmonate and the BIK/BAK response system (Thomma et al., 1999; Veronese et al., 2006).  
102 More recently, high-throughput digital imaging analysis of the *A. thaliana/B. cinerea* interaction  
103 has allowed the identification hundreds of genes associated with the size of the lesion, with  
104 most genes being associated to one or two isolates (Corwin et al., 2016a). The high-throughput  
105 digital imaging pipeline used also can provide additional visual traits that facilitates the  
106 comparison of novel visual traits with traditional measures related to disease resistance. We  
107 examined a wide array of visual information of lesion traits to find a broad and largely  
108 orthogonal subset of visual parameters to measure the interaction, including lesion yellowness,  
109 lesion greenness, and lesion shape.

110

111 Here, we rely on the natural variation in the host and pathogen for the  
112 Arabidopsis/Botrytis pathosystem to measure a variety of novel infection-related traits and to  
113 conduct genome wide association (GWA) mapping within the host. Genetic mapping will allow  
114 us to identify host genes associated with these novel visual traits and expand our  
115 understanding of the genetic architecture of quantitative resistance against generalist  
116 pathogens. Previous work has shown that GWA mapping, when applied to the *Arabidopsis*  
117 *thaliana/Botrytis cinerea* pathosystem, can identify genes involved in polygenic susceptibility  
118 traits, such as lesion size and camalexin production (Corwin et al. 2016). This approach also  
119 does not impart *a priori* assumptions on the genes or mechanisms that may play a role in  
120 controlling the trait in question. This is exemplified by the observation that many of the genes  
121 identified by GWA mapping in *A. thaliana* have not been previously linked to this pathosystem  
122 (Jarvis, 1977; Staats et al., 2005; Choquer et al., 2007; Rowe and Kliebenstein, 2008; Mengiste  
123 et al., 2010; Valiuskaite et al., 2010; Amselem et al., 2011; Corwin et al., 2016b; Corwin and

124 Kliebenstein, 2017). For example, this identified Late-elongating Hypocotyl (*LHY*; *At1g01060*), a  
125 key developmental and circadian-regulated gene not previously linked to disease resistance as  
126 having a significant effect on *B. cinerea* resistance (Corwin et al., 2016b). In addition to known  
127 genes, this approach could identify disease resistance effects in completely novel genes like  
128 *At4g01860*, an uncharacterized Cul4-RING E3 component. This suggests that extending this  
129 analysis to other traits may allow the identification of additional new disease resistance loci.  
130 Further, this can be directly facilitated by a reanalysis of the digital images collected from the  
131 previous study explore other traits related to disease resistance.

132         Within the current study, we re-analyzed the images collected from our previous work  
133 to measure visual aspects of lesion development that are not commonly measured with respect  
134 to disease resistance, specifically lesion shape and color. A genome wide association mapping  
135 analysis of select traits in *Arabidopsis* revealed a large compendium of genes associated with  
136 lesion size, lesion yellowness, lesion greenness, and lesion shape. GO enrichment analysis  
137 showed that there were biological processes specific to subsets of traits rather than processes  
138 affecting all of the lesion-associated traits. To validate the results of the GWA mapping, we  
139 selected 23 genes associated with one or more of the lesion traits and compared the  
140 phenotypes of T-DNA knockout mutants. The validation rate was highest for lesion size, at 60%,  
141 and lower for the color and shape traits: 33% for lesion yellowness, 38% for lesion greenness,  
142 and 20% for lesion eccentricity. This further demonstrated that the genes affected subsets of  
143 lesion traits rather than being specific to all traits. As such, expanding our phenotypic analysis  
144 of plant-pathogen interactions to novel visual traits like lesion shape and color can identify  
145 different mechanisms than solely focusing on lesion size.

146

## 147 **Results**

### 148 **Identification of Alternative Disease Related Traits**

149         Using a custom digital image analysis pipeline, we had previously measured lesion size  
150 (area) to identify *A. thaliana* genes controlling lesion size within the *Arabidopsis*  
151 *thaliana/Botrytis cinerea* pathosystem using four diverse pathogen genotypes (Corwin et al.,  
152 2016b). This previous study used 96 diverse *A. thaliana* accessions chosen based on similar

153 flowering time to minimize ontogenic variation, which also decreased population structure and  
154 rare alleles within the collection. The host pathogen interaction was digitally recorded within a  
155 randomized complete block design over two experiments with 4 independent biological  
156 replicates per experiment per genotype. Specific lesion traits were obtained using a digital  
157 image analysis pipeline for which we have previously only reported results for lesion size  
158 (Corwin et al., 2016b). Using the same images, we adapted our imaging pipeline to quantify 75  
159 different lesion parameters from the infections. These included a wide range of traits from the  
160 number of pixels for specific hues within the lesion, lesion perimeter, proportion of leaf the  
161 lesion occupied, length of the major and minor axes of the lesion, eccentricity of the perimeter,  
162 etc. (Corwin et al., 2016a)(Figure 1). As previously reported, there is a wide range of lesion sizes  
163 across the host/pathogen interactions (Figure 1A versus C). In addition to lesion size, there is  
164 variation in color both within the lesion and the residual leaf. For example, some  
165 host/pathogen interactions have large chlorotic sectors surrounding the lesions (Figure 1A, C  
166 and F), while others have less chlorosis surrounding the developing lesion (Figure 1B and E). In  
167 previous work, we have shown that the pathogen is limited solely to the developing lesion and  
168 these chlorotic regions are systemic plant responses to the infection (Rowe and Kliebenstein,  
169 2008; Corwin et al., 2016a). Even within the lesion there are color variants with some being  
170 yellower (Figure 1A) while others have a greener hue (Figure 1D). In addition to lesion color,  
171 there is variation in lesion shape with some lesions being highly symmetrical and circular  
172 (Figure 1D and F) while others are elongated along the major axis of the leaf, possibly due to  
173 extended pathogen growth along the mid-vein (Figure 1A and B). This preferential mid-vein  
174 growth has also been previously seen as genetically variable across *B. cinerea* infecting *A.*  
175 *thaliana* (Corwin et al., 2016a). We proceeded to study if these additional measurements of the  
176 interaction between the plant and the pathogen were providing unique genetic insight into the  
177 virulence outcome that was not readily obtained from solely lesion size.

178

### 179 **Hierarchical Clustering Analysis for Trait Selection**

180 To select a subset of traits to study further, we conducted a hierarchical clustering analysis  
181 (HCA) and constructed a heat map of the 75 lesion traits across the 96 *A. thaliana* accessions

182 infected with the different *B. cinerea* isolates (Figure 2). This analysis allowed us to assess the  
183 inter-relatedness of these alternate infection traits both with each other, and with lesion size,  
184 to determine whether the traits are providing distinct information with respect to each other.  
185 The HCA showed extensive variation in all the traits dependent on *A. thaliana* accessions and *B.*  
186 *cinerea* isolates, leading to four major trait clusters (Figure S1). In these clusters, color and  
187 shape traits distinctly clustered apart from lesion size, and varied across plant accession. From  
188 this plot, we chose to proceed with three distinct traits for further analysis; lesion yellowness  
189 (the proportion of yellow pixels within the lesion to total pixels within the lesion), lesion  
190 greenness (total mm<sup>2</sup> of green pixels within the lesion), and lesion eccentricity (maximum lesion  
191 diameter – minimum diameter/maximum lesion diameter). These traits, along with lesion size,  
192 represent a broad sampling of the identified variation in the traits and provide a diverse array  
193 of measurable aspects of the *A. thaliana* – *B. cinerea* interaction.

194 From the HCA, lesion yellowness provides a trait that is distinct from lesion size  
195 suggesting that it may provide a highly unique measure of the interaction. We also focused on  
196 lesion greenness to increase our sampling within the hierarchical cluster space around lesion  
197 yellowness. Lesion greenness may be related to the presence of green islands that were noted  
198 in other plant pathogen interactions but have not been commonly studied (Walters et al.,  
199 2008). Lesion eccentricity was chosen as it is a spatial trait that is uncorrelated with lesion size  
200 traits. Previous work in our lab had suggested that lesion shape variation may be linked to  
201 genetic variation in the pathogens ability to identify and grow directionally along the mid-vein  
202 of the host leaf (Corwin et al., 2016a). Thus, including this trait may provide unique genetic  
203 insight into the ability of the pathogen to directionally orient growth along primary leaf  
204 vasculature within the host. We also included lesion size (mm<sup>2</sup>) in our analysis to provide a  
205 direct comparison to previous reports. Thus, these four traits appear to have natural genetic  
206 variation both within the plant and pathogen that may provide unique insights into the  
207 plant/pathogen interaction.

208

209 **Genetic Variation in New Lesion Traits**



210 We utilized the phenotypic measurements for all four traits across all genotypic interactions of  
211 *A. thaliana* and *B. cinerea* to quantitatively assess the role of host and pathogen genetic  
212 variation in controlling these traits. We used linear models to analyze the variance across the 96  
213 *A. thaliana* accessions and the four *B. cinerea* isolates. The genetic variation in both the  
214 pathogen and the host significantly influenced all four resistance associated traits (Table1). The  
215 proportion of variance attributable to *A. thaliana* accession was significant for these four traits,  
216 although relatively small for this experiment. The heritability across the entire dataset that was  
217 solely attributable to *A. thaliana* was relatively low albeit significant for each trait tested (Table  
218 1). The proportion of heritability attributable to pathogen genetic variation was higher for the  
219 color and size traits ranging from 10-40% but there was no significant heritability within this  
220 small collection of isolates ascribed to pathogen variation for lesion eccentricity (Table 1). In  
221 contrast, the eccentricity was controlled by the interaction of genetic variation in the host and  
222 pathogen (Table 1), suggesting that this trait is highly dependent on the interaction between  
223 the pathogen genotypes and the different plant accessions. Thus, there is significant genetic  
224 variation for all traits that is dependent upon both the host and pathogen genomic diversity.

225 For further analysis, we obtained the model-corrected least squared means from these  
226 linear models to account for the environmental influence. This should help to focus the analysis  
227 on the genetic influence of the plant host in the downstream genetic mapping. Given the  
228 significance of the interaction between plant accession and pathogen isolate, we analyzed each  
229 lesion trait individually for each pathogen genotype across the diverse *A. thaliana* accessions as  
230 a separate trait to maximize our ability to identify causal loci.

231

### 232 **Analysis of Covariance of Lesion Traits**

233 To test how the lesion size, color, and shape traits may correlate across the different  
234 host/pathogen combinations, we conducted an ANCOVA (Analysis of CoVariance) comparing  
235 each pair of traits across the 96 diverse *A. thaliana* accessions for each of the four *B. cinerea*  
236 isolates (Figure 3). Significant correlations ( $p < 0.05$ ) between the color and size, traits indicate  
237 that these three traits are generally related. Lesion yellowness and greenness show a positive  
238 correlation, both overall and within each *B. cinerea* isolate group, and this correlation is

239 statistically consistent between groups (Figure 3). In contrast, lesion color (both greenness and  
240 yellowness) and size, display significant variation amongst the *B. cinerea* isolates for the  
241 relationship with B05.10 and Supersteak isolates showing a negative correlation between lesion  
242 yellowness and size while Apple517 and UKRazz show a neutral or slightly positive correlation  
243 (Figure 3). In contrast to color and lesion size, eccentricity does not display uniform correlations  
244 across all the isolates. Instead, the significant correlations are highly dependent on the  
245 interaction with isolate (Figure 3). For example in eccentricity by lesion size, there is a strong  
246 negative correlation in the *B. cinerea* isolates B05.10 and Supersteak, while only a very slight  
247 positive correlation in Apple517 and UKRazz.

248 This suggests that while there is some common and some trait dependent genetic  
249 variation in how *A. thaliana* responds to these diverse *B. cinerea* isolates using these lesion  
250 traits. This analysis revealed that while there is some correlation between the four lesion traits,  
251 the host and pathogen genotypes alter these relationships indicating that there is not a simple  
252 mechanistic basis for these relationships. Further, the four lesion traits represent measures of  
253 distinct and nuanced interactions between the plant and pathogen, and that the genes  
254 associated with each trait likely influence different mechanisms in a multifaceted genetic  
255 storyline.

256

### 257 **Genome-Wide Association Mapping of Lesion Traits**

258 To identify *A. thaliana* genes that are associated with these new lesion traits, we conducted a  
259 genome-wide association (GWA) study. We used the model-corrected trait means for each *A.*  
260 *thaliana* accession infected independently with the four different *B. cinerea* isolates across the  
261 traits of lesion size, eccentricity (shape), and yellow and green color. We employed a publicly  
262 available database of genomic polymorphisms across the 96 *A. thaliana* accessions consisting of  
263 115,301 SNPs with minor allele frequency (MAF) of > 0.2 (Atwell et al., 2010; Corwin et al.,  
264 2016b). The model for GWA mapping used a previously published ridge regression approach  
265 with a permuted-effects threshold, which has previously been used to successfully identify  
266 causal loci for both plant/pathogen interactions and plant metabolic variation (Shen et al.,  
267 2013; Corwin et al., 2016b; Francisco et al., 2016; Kooke et al., 2016). Using the means for each

268 *A. thaliana* accession for each of the four lesion traits in response to the four individual *B.*  
269 *cinerea* isolates, we conducted GWA mapping for each combination separately for each isolate,  
270 resulting in four separate GWA maps for each trait. Because the variance and mean of each  
271 lesion phenotype differed according to pathogen genotype, the resulting effect sizes for *A.*  
272 *thaliana* SNPs also varied in magnitude. To create comparative Manhattan plots of the results  
273 for a single trait across all four *B. cinerea* isolates, we z-scaled the SNP effect sizes within each  
274 pathogen and overlaid the results (Figures 4 and 5). We calculated an effect size significance  
275 threshold for each individual trait by permuting the data one thousand times and running the  
276 ridge regression on the permuted data, and locating the 95<sup>th</sup> percentile (Tables S3-S6).

277 The comparative Manhattan plots (Figures 4, S2 and S3) showed that all four lesion  
278 associated traits lacked large, distinct SNP peaks. Instead, there are numerous significant SNPs  
279 with small-to-medium effect sizes distributed across the genome, suggesting a highly polygenic  
280 nature underlying the variation in these traits. Further, the significant SNPs different between  
281 the *B. cinerea* isolates, suggesting that most SNPs are dependent upon the interaction between  
282 plant and pathogen genotypes (Figures 4 and 5). For lesion Yellowness and Eccentricity, only  
283 Apple517 had significant SNPs possibly because this isolate had the highest level of phenotypic  
284 diversity in these traits (Figure 3). We next proceeded to identify putative causal loci in the  
285 GWA results by calling a gene as significantly associated with a trait if two or more SNPs within  
286 the coding region and 1 kb of the 5' upstream and 3' downstream regions had effect sizes  
287 above the 95<sup>th</sup> percentile threshold (Chan et al., 2011; Corwin et al., 2016b). This approach has  
288 previously been shown to reduce false positives within the dataset (Corwin et al., 2016b).  
289 Combining the analyses of each trait across the *B. cinerea* isolates for which there were  
290 significant SNPs identified 2,382 genes associate with lesion size, 4,383 with lesion yellowness,  
291 4,110 with lesion greenness, and 1,933 with lesion eccentricity. Agreeing with the hypothesis  
292 that these traits can identify new cellular mechanisms, the majority of the genes identified are  
293 associated with only one or a few traits (Figure 5). Few genes (2.5% of 7940 total genes  
294 identified) were associated with all four lesion related traits (Figure 5). Of the genes associated  
295 with lesion size, 8% were not associated with any of the other three lesion traits. Likewise, 22%  
296 of genes associated with yellowness were associated exclusively with that phenotype, 20% for

297 green, and 7% for eccentricity. Overall, 57% of the genes found in this study associated with  
298 only one of the lesion traits and 31% associate with exactly two of the lesion traits. These  
299 results reinforce the idea that while there is some correlation between the traits, they are  
300 quantitative traits that represent different measures of the plant-pathogen interaction.

301

### 302 **GO Category Enrichment Analysis**

303 We performed a gene ontology (GO) category enrichment analysis on biological processes of  
304 genes associated with each of the four traits to identify *A. thaliana* mechanisms that may  
305 influence variation in lesion traits. We performed GO enrichment analysis for each set of  
306 candidate genes (Table 2). Both lesion color traits linked to genes involved in defense against  
307 pathogens and insects (Table 2). They also identified unique enrichment categories wherein  
308 each trait had different enriched categories. Specifically, lesion greenness shows enrichment in  
309 maintenance of shoot apical meristem identity, and lesion yellowness in lignin biosynthetic  
310 process. In contrast, eccentricity associated candidate genes are enriched in a variety of  
311 unexpected processes, such as negative regulation of flower development and negative  
312 regulation of reproductive process, in addition to known pathogen-associated processes, such  
313 as cell wall thickening and callose deposition in cell walls. Genes controlling cell wall  
314 modification play a role in plant defense strategies to contain the infected area, but have not  
315 been studied in the context of lesion shape (Cantu et al., 2008; Mengiste et al., 2010; Bethke et  
316 al., 2016). Thus, these novel visual traits are identifying known defense mechanisms while also  
317 extending analysis out to new pathways.

318 In contrast to the individual trait candidate gene lists, The top enrichment categories for  
319 the 200 *A. thaliana* genes that associate with all four lesion traits were defense response,  
320 response to stress, immune response, plant-type hypersensitive response, programmed cell  
321 death, chromatin remodeling, and response to salicylic acid (Table S2). Thus, the core genes  
322 associated with all four lesion related traits linked in part to known defense genes. Overall, the  
323 enrichment categories of genes associated with only a single trait uncovered several distinct  
324 and unique biological processes that are tangentially associated with defense while genes  
325 shared across four traits were more conservatively associated with defense. These differently

326 represented enrichment categories according to trait reflect varying, non-overlapping plant  
327 mechanisms involved in the multifaceted disease resistance against generalists. This analysis  
328 revealed four portraits of plant defense that showed some overlap but also revealed the extent  
329 of biochemical mechanisms involved in lesion traits.

330

331

### 332 **Validation of Genes Associated with Lesion Phenotypes**

333 To test whether the trait-associated genes we found in the GWA mapping were causal, we  
334 measured the infection-related phenotypes on knockout mutants of genes associated with each  
335 trait of interest. We chose 23 genes (Table 3) based on GWA effect-size ranking, specificity or  
336 overlap of traits effected, and ready availability of viable homozygous lines of T-DNA knockout  
337 mutants. The lines were grown, infected, and phenotyped using the same image analysis  
338 software as the initial 95 *A. thaliana* accessions. All mutants were tested for resistance against  
339 each isolate using 20 independent biological replicates per genotype spread across two  
340 experiments. All the traits were measured on each lesion and each trait was independently  
341 tested for a difference between WT and mutant using ANOVA (Table 3). The validation rate for  
342 lesion size was 60%, 33% for lesion yellowness, 38% for lesion greenness, and 20% for lesion  
343 eccentricity. Interestingly, this correlates with the overall fraction of each trait controlled by  
344 genetic variation (Table 1). This suggests that part of the lower validation rates for the new  
345 traits may be a power-to-detect effect issue and require increased replication. Another  
346 complication is that in our GWA mapping, we observed that effect sizes for individual SNPs  
347 within a single gene can be both positive and negative in comparison to the reference Col-0  
348 accession (Figure 6 and Table 3). Thus, the natural loci likely have multiple haplotypes with  
349 differing functionalities while the validation mutants are unidirectional loss-of-function mutants  
350 within the reference Col-0 accession. We illustrate this with AT4G17010, a component of the  
351 transcription factor III B complex, where significantly associated SNPs have both positive and  
352 negative effects in comparison to the reference *A. thaliana* accession Col-0 (Figure 6 and Table  
353 3). Three SNPs have effect sizes that fall above the 95<sup>th</sup> percentile threshold in the positive  
354 direction for lesion yellowness, and two have a similarly large magnitude in the negative

355 direction, indicating that the different haplotypes of this gene uniquely affect lesion yellowness  
356 (Figure 8). Clustering the accessions according to SNPs within this particular gene separates the  
357 haplotypes into five major groups, with groups I and II containing the SNPs with significant  
358 negative effect size, groups III and IV containing the SNP of greatest positive effect size, and  
359 group V containing the remaining diverse haplotypes (Figure 7). Even in the face of this  
360 complication, the T-DNA knockout mutant for the gene AT4G17010, did lead to altered lesion  
361 yellowness but not lesion size (Table 3). Thus, we can use GWA from high-throughput digital  
362 imaging to identify and validate new genes affecting visual lesion traits beyond lesion size.

363

### 364 **Specific Loci and Trait Overlap**

365 The validation tests showed that the genes were highly specific in their effects on the lesion  
366 traits by affecting only one or two traits. Only two genes, CESA2 and AT4G01883, were linked to  
367 three traits (Figure 8). Critically, no mutant affected all of the measured traits (Figure 7). This  
368 analysis identified new genes not previously linked to resistance to *B. cinerea*. A knockout  
369 mutant for *PHYTOCHROME E (phyE)*, previously linked to shade avoidance, germination,  
370 seedling de-etiolation, and flowering time (Halliday and Whitelam, 2003), showed a statistically  
371 significant increase in lesion size and lesion yellowness compared to wildtype. It had been  
372 previously demonstrated that phyE affects stomatal conductance and photorespiration, which  
373 have been shown to play an important role in signaling programmed cell death and systemic  
374 acquired resistance defense response (Muhlenbock et al., 2008; Szechynska-Hebda et al.,  
375 2010). Other phytochromes, such as phyB, have been linked with defense response in *A.*  
376 *thaliana* via this pathway (Griebel and Zeier, 2008; Zhao et al., 2014) but there is no prior  
377 evidence in the literature of phyE affecting resistance. A knockout mutant of *SULFATE*  
378 *TRANSPORTER 4.1 (sultr4;1)* showed a greater lesion eccentricity. Sultr4;1 transports Sulphur  
379 from storage in the vacuole, facilitating the synthesis of Sulphur-containing amino acids and  
380 glutathione, a compound involved in balancing cellular redox (Zuber et al., 2010b). Sultr4;1 has  
381 not been previously linked with pathogen resistance, yet somehow plays a role in the defining  
382 the shape of a Botrytis lesion. This gene was neither associated with nor found to affect any of  
383 the other lesion traits, highlighting the importance of expanding the visual information used in

384 investigation of lesions. This highlights the utility of measuring different lesion related traits  
385 beyond biomass or lesion size to identify new resistance mechanisms.

386

### 387 **Discussion**

388 In the analysis of plant/pathogen interactions, there is a dominant focus on measuring  
389 pathogen success either as lesion area or pathogen biomass to quantify the level of  
390 resistance/virulence in the interaction. However, this is merely one aspect of the interaction  
391 and active infections can affect many different traits within the plant host (Agrios, 2005). New,  
392 non-destructive imaging methods are beginning to illuminate other aspects of the host-  
393 pathogen interaction that have largely been unstudied in mechanistic studies. Here, we utilized  
394 a simple digital imaging platform to show that it is possible to identify the genetic basis of these  
395 other defense-related traits, such as the color and shape of the developing lesion in addition to  
396 the traditional size of the lesion. This shows that the generation of these visual traits is  
397 genetically determined by variation in the host, the pathogen and the interaction of genetic  
398 variation in the two organisms similarly to lesion size but can identify genes not known to  
399 influence lesion size.

400         Conducting GWAS within the *A. thaliana* accessions and mutant validation studies  
401 showed that these four traits had a blend of distinct and overlapping genetic mechanisms  
402 controlling their generation. Classical *B. cinerea* resistance genes, like *COI1* and *PAD3*,  
403 influenced both color and size of the developing lesion, but not the shape of the lesion,  
404 showing the role of known resistance mechanisms in these new lesion traits (Thomma et al.,  
405 1998; Ferrari et al., 2003; Kliebenstein et al., 2005; Rowe et al., 2010)(Figure 7). In contrast,  
406 some known resistance genes like *ACD6* affected only the color but not the size or shape of the  
407 lesion (Rate et al., 1999; Song et al., 2004; Lu et al., 2009)(Figure 7). More importantly, using  
408 new lesion-related traits for GWAS identified new genes involved in resistance to *B. cinerea*  
409 that had not previously been identified. This includes genes involved in light signal transduction,  
410 LUX, PHOT1 and PHYE, as well as sulfur transport (Clack et al., 1994; Devlin et al., 1998; Briggs  
411 and Christie, 2002; Halliday and Whitelam, 2003; Kataoka et al., 2004; Hazen et al., 2005; Zuber  
412 et al., 2010a; Nusinow et al., 2011; Sanchez-Lamas et al., 2016). The three light-related genes

413 affected different lesion traits with PHOT1 being specific to lesion size, PHYE altering lesion size  
414 and yellowing while LUX and the sulfur transporter specifically altered lesion size (Figure 7).  
415 Thus, even these three genes that might have been expected to have overlapping effects show  
416 different and distinct effects from each other. This shows that there are specific mechanisms  
417 for each set of the traits and to fully understand the interaction requires more than simply  
418 measuring pathogen growth.

419

#### 420 **Lesion Eccentricity as an Indicator of Pathogen Success.**

421 One difficulty of new traits from high-throughput digital imaging is to comprehend their  
422 possible biological role. For example lesion eccentricity (i.e. deviation from circularity) is a trait  
423 that is genetically controlled by both the pathogen and the host genes. Heritability of lesion  
424 eccentricity was 4.3% for plant accession, <0.1% for isolate, but jumped to 11.1% for  
425 accession:isolate, indicating that variation in this trait is highly dependent on the interaction of  
426 plant and pathogen genotypes. In two of the four pathogen genotypes, B05.10 and Supersteak,  
427 there was a negative correlation between lesion size and eccentricity suggesting that eccentric  
428 lesions tend to be smaller (Figure 3). In previous work, we had shown that eccentric lesions are  
429 associated with preferential growth along the primary vasculature, which implies that there is a  
430 shift from general radial outward growth to directed growth along the leaf midrib (Corwin et  
431 al., 2016a). Purely radial growth is typically considered to maximize local growth in microbial  
432 organisms and that would argue that directed growth may foresake potential local growth. A  
433 possible reason for forsaking local growth is that this could be a virulence strategy of some  
434 pathogen isolates to more rapidly move systemically through the vasculature of the plant. The  
435 fact that there are plant genes specific to affecting this trait indicates that *A. thaliana* has  
436 specific mechanisms that are geared towards altering the pattern of pathogen growth. As such,  
437 the success of the pathogen in the host-pathogen interaction would be a combination of the  
438 ability to infect the local tissue as well as move to distal tissue rapidly. Equally, if the pathogen  
439 has different growth strategies to optimize fitness, the plant would have to defend against local  
440 growth and growth geared towards spread of the pathogen.

441



## 442 **Lesion Color Genetic Mechanisms and Agriculture**

443 It is harder to assess the potential ecological or evolutionary role of specific genetic  
444 mechanisms influencing the color of a lesion. However, lesion color is a potentially key aspect  
445 of the plant-pathogen interaction for vegetable and fruit crops. For example, a very small lesion  
446 that gives rise to a highly noticeable color (e.g. Figure 1c) on a fruit or vegetable would greatly  
447 decrease the consumer acceptance of that product and lead to post-harvest crop loss if the  
448 lesion was large. As such, understanding the specific genetic mechanisms influencing the  
449 different color traits can have significant agricultural importance and they are presently not  
450 studied. Our study showed that as previously described, COI1 plays a key role in controlling the  
451 development of yellow in the plant-pathogen interaction (Rowe et al., 2010). This agrees with  
452 the known connection of jasmonate signaling to photosynthetic/plastid functioning (Kazan and  
453 Manners, 2011; Attaran et al., 2014; Campos et al., 2016). Interestingly, this also showed that  
454 additional genes not previously known to affect *B. cinerea* resistance also function in  
455 determining the level of lesion yellowness, like PHYE (Figure 8).

456 Genes associated with lesion greenness were enriched in activation of the immune  
457 system, activation of the innate immune system, and movement of cellular or subcellular  
458 components. These biological processes have obvious roles in plant response to a fungal  
459 infection, but their links with lesion greenness are less obvious. Previous studies had identified  
460 green islands in some plant-pathogen interactions, dead green tissue within pathogen lesions,  
461 as associated with increased levels of cytokinins and polyamines that delay senescence, as well  
462 as a variety of fungal toxins (Walters et al., 2008). We previously attempted to extract green  
463 color from lesions using both methanol and hexane, but were unsuccessful, indicating that the  
464 source of this greenness is not free chlorophyll (Corwin et al., 2016a). Further, greener lesions  
465 had no living plant cells from what we could assess with trypan blue staining (Corwin et al.,  
466 2016a). However, the genes associated with greenness included known *B. cinerea* resistance  
467 genes like COI1, PAD3 and PAD4 (Figure 7). Interestingly, the only gene solely associated with  
468 lesion greenness was ACD6, a gene that is key to regulating plant cell death in response to  
469 pathogen attack. This suggests that there may be a role for how the plant cell dies in controlling  
470 this color. While our results do not provide an immediate direct mechanism for the color traits,

471 it does show that there are potential mechanisms specific to the color traits in plant-pathogen  
472 interactions that maybe useful for understanding the infection process.

473

## 474 **Conclusion**

475 This study has utilized high-throughput digital imaging of plant-pathogen interactions to  
476 uncover the genetics for previously uncharacterized lesion traits. Many of the candidate genes  
477 that were tested with insertional mutants affected more than one aspect of the plant-pathogen  
478 interaction, color, lesion size or shape of the lesion. But no gene affected all of these aspects of  
479 the interaction. As most studies of quantitative resistance focus on biomass or lesion size  
480 measurements while not studying lesion shape or color, our findings suggest that there are  
481 potentially unrecognized mechanisms that may be important for plant-pathogen interactions.  
482 Further validation studies could reveal more large-effect plant genes affecting quantitative  
483 resistance, filling gaps in our knowledge of cellular mechanisms involved in lesion traits and  
484 pathogen virulence and deserving of attention in plant breeding programs. Equally, these traits  
485 raise the need for broader life-history studies of plant-pathogen interactions in the field to  
486 identify the potential ecological or evolutionary drivers of these traits. GWA mapping coupled  
487 with high-throughput digital measurement of virulence-associated traits will be a useful tool in  
488 understanding broader plant-pathogen interactions.

489

## 490 **Materials & Methods**

### 491 **Population Selection for GWAS**

492 We used a previously published collection of 96 *A. thaliana* accessions that was chosen for  
493 pathogen resistance GWAS based on similarity in flowering time ( $63.1 \pm 0.95$  (s.e.) days to  
494 flowering). This population minimizes the indirect effects of ontogenic variation caused by a  
495 wide range of flowering times, while also reducing the effect of rare, medium effect alleles in  
496 order to inflate genetically-related residuals (Corwin et al., 2016b). Selection based on  
497 flowering time also removed genetic outliers and minimized population structure. The selected  
498 population extends broadly across the known phylogeny of *A. thaliana* accessions, increasing  
499 the resolution of the association study (Corwin et al., 2016b).

500

## 501 **Growth Conditions and Pathogen Infection**

502 Seeds were cold stratified in 1% Phytagar at 4°C for seven days prior to sowing. Seeds were  
503 then sown in a randomized complete block design with three seeds per cell, into four 104-cell  
504 flats containing standard potting soil (Sunshine Mix #1, Sun Gro Horticulture, Agawam, MA).  
505 Plants were covered with a transparent humidity dome, placed in short day (10h full spectrum  
506 light) conditions in a controlled environment at 22°C, and watered biweekly as needed. After  
507 one week, seedlings were thinned to one seedling per pot. Sowing was repeated two weeks  
508 later to create another balanced randomized experiment so that eight biological replicates per  
509 accession were present across the two independent experiments in a randomized complete  
510 block design.

511 After five weeks of growth, mature leaves were excised, and placed on agar flats (Denby  
512 et al., 2004; Rowe and Kliebenstein, 2008). Individual leaves were inoculated with either one of  
513 four phenotypically and genotypically diverse isolates of *B. cinerea* (Apple517, B05.10,  
514 Supersteak, UKRazz) or a mock-inoculated control (Atwell et al., 2015; Corwin et al., 2016b;  
515 Corwin et al., 2016a). Spores of five-day old sporulation cultures grown on organic peach slices  
516 were collected in sterilized 1/2x organic grape juice, counted with a hemocytometer, and  
517 standardized to a solution of 10 spores  $\mu\text{l}^{-1}$ . Individual leaves were inoculated with a single 4 $\mu\text{l}$   
518 droplet of one of the *B. cinerea* isolates or mock-inoculated with a control of 1/2x organic grape  
519 juice, for approximately 40 spores per leaf. The inoculated leaves were kept under transparent  
520 humidity domes at room temperature to allow lesions to grow for three days. At 72 hours post  
521 inoculation (hpi), photos were taken of infected leaves along with a 1 cm<sup>2</sup> scale for size  
522 reference using an 18 Megapixel high resolution T3i Canon camera outfitted with an EF-S 10-  
523 22mm f/3.5–4.5 USM ultra-wide angle lens, achieving a resolution of approximately 10 pixels  
524 per mm (Corwin et al., 2016b).

525

## 526 **Image Analysis**

527 A semi-automated image analysis script using the open-source R statistical environment (R  
528 Development Core Team, 2016) and the Bioconductor packages EImage and CRImage

529 (Failmezger H, 2010; Pau et al., 2010) was used to measure lesion traits such as lesion size,  
530 shape, and color (Corwin et al., 2016b). Briefly, the script identified leaves as objects that are  
531 have a green hue and highly saturated at their perimeter, whereas lesions were brown objects  
532 of low saturation within the leaf perimeter. Lesion and leaf mask images were generated and  
533 manually refined, or corrected where faulty. The area in pixels of these leaves and lesions, as  
534 well as the numbers and proportions of pixels of certain colors, and dimensions such as major  
535 and minor axes, perimeter, and eccentricity, were recorded. These values were converted to  
536 mm<sup>2</sup> using a 1 cm reference standard contained within each image.

537

### 538 **Genome Wide Association Mapping**

539 For each trait, we modeled heritability and obtained the model corrected least squared means  
540 using the linear model:

$$541 \quad \text{Lesion trait}_{epab} \sim \beta_0 + E_e + P_p + A_a + B_b + A:B_{ab} + \varepsilon_{epab}$$

542 where E is experimental replicate, P is the individual plant, A is the genotype of the Arabidopsis  
543 accession and B is the genotype of the Botrytis isolate. Experimental replicate was modeled as a  
544 random effect, whereas individual plant, Arabidopsis accession and Botrytis isolate were  
545 categorical. Publicly available data on genomic polymorphisms of the selected *A. thaliana*  
546 accessions was collected from the *A. thaliana* 1,001 genomes project (Ossowski et al., 2008;  
547 Cao et al., 2011; Gan et al., 2011; Schneeberger et al., 2011; Long et al., 2013; Alonso-Blanco et  
548 al., 2016). SNPs with minor allele frequency (MAF) < 0.2 were filtered out, resulting in a set of  
549 115,310 SNPs for the 95 accessions. Association mapping was performed using the bigRR  
550 package in the R statistical environment (Shen et al., 2013). This previously published and  
551 validated method uses ridge regression, an appropriate approach given the small proportion of  
552 phenotypic variance attributable to genotype (Corwin et al., 2016b; Francisco et al., 2016). The  
553 ridge regression models the effects of all polymorphisms in a single model, treating each SNP as  
554 a random effect and introducing a bias to the regression estimates to reduce standard error.  
555 Thus, each polymorphism is assigned a heteroscedastic effect size (HEM), rather than a p-value,  
556 which is difficult to determine for random variables. Instead, a significant effect threshold value  
557 is delineated by permuting the phenotype data as it corresponds to the polymorphism data

558 1,000 times, and taking the 95<sup>th</sup> and the 99<sup>th</sup> percentiles. A gene is considered to be associated  
559 with a trait when two or more SNPs within the coding region have an effect size greater than  
560 the 95<sup>th</sup> percentile threshold. This is a functional genome wide prediction method that has been  
561 shown to provide similar results to EMMA based GWAS (Kooke et al., 2016). Further, this GWAS  
562 pipeline has yielded a high rate of gene validation for a number of traits within *A. thaliana*  
563 (Corwin et al., 2016b; Francisco et al., 2016).

564

### 565 **GO Enrichment Analysis**

566 Gene ontology (GO) enrichment analysis for biological processes was performed on all genes  
567 significantly associated with each of the four lesion traits using the Bioconductor packages  
568 org.At.tair.db, topGO, and goProfiles in the R statistical environment. Genes within *A. thaliana*  
569 that contain at least two significant SNPs that were associated with the trait of interest in the  
570 dataset were used as the genomic background sample for the analysis.

571

### 572 **Validation Tests**

573 A selection of 23 *A. thaliana* genes that were found to be highly associated with Lesion Size,  
574 Lesion Greenness, Lesion Yellowness, and Lesion Eccentricity was made based on ready  
575 availability of viable homozygous T-DNA knockout lines. Seventeen of the lines had been  
576 previously identified and tested for lesion size and an additional six genes were chosen based  
577 on the magnitude of predicted effect size (Corwin et al., 2016b). Plants were grown as  
578 described above and no genotypes showed any evidence of flowering within this time frame in  
579 these conditions. At five weeks of age, the six first fully mature leaves were excised and  
580 inoculated with the four isolates of *B. cinerea* mentioned above at the same concentrations,  
581 and imaged at 72 hpi. These leaves showed no visual evidence of senescence at the start of the  
582 experiment and the control grape juice mock-inoculated leaves showed no developing lesion  
583 during the image analysis. The experiment was carried out in a randomized complete block  
584 design, with two experimental replicates each containing 10 biological replicates, amounting to  
585 20 replicates for each *A. thaliana* mutant / *B. cinerea* isolate combination. Statistical differences

586 between the WT Col-0 background and each mutant genotype were assessed using the linear  
587 model:

$$588 \text{ Lesion trait}_{epi} \sim \beta_0 + E_e + P_p + I_i + P: I_{pi} + \varepsilon_{epi}$$

589 where E is experimental replicate, P is plant genotype, and I is the fungal isolate genotype.  
590 Experimental replicate was modeled as a random effect, where plant and fungal isolate  
591 genotypes were categorical.

592

### 593 **Acknowledgments**

594 Financial support for this work was provided by the National Research Foundation DNR grant  
595 99, US NSF grants IOS 1339125, MCB 1330337 and IOS1021861, and the USDA National  
596 Institute of Food and Agriculture, Hatch project number CA-D-PLS-7033-H.

597

598

599 **TABLE 1 – Heritability of Lesion Traits**

600 For each of the four traits, the table displays the sum of squares for each term in an analysis of  
 601 variance, p values for each term, and the calculated heritability (proportion of total variance)  
 602 attributed to the specific model terms. The analysis used the model Lesion Trait ~ Experiment +  
 603 Accession \* Isolate.

604

|                     | SS        | P       | Heritability |
|---------------------|-----------|---------|--------------|
| <b>Size</b>         |           |         |              |
| Experiment          | 1224      | 0.002   |              |
| Plant               | 179962    | < 0.001 |              |
| Accession           | 25273     | < 0.001 | 3.0%         |
| Isolate             | 333466    | < 0.001 | 39.5%        |
| Accession:Isolate   | 57552     | < 0.001 | 6.8%         |
| <b>Yellow</b>       |           |         |              |
| Experiment          | 2387113   | 0.036   |              |
| Plant               | 964232385 | < 0.001 |              |
| Accession           | 70751623  | 0.014   | 2.5%         |
| Isolate             | 557388090 | < 0.001 | 20.0%        |
| Accession:Isolate   | 176639269 | 0.083   | 6.3%         |
| <b>Green</b>        |           |         |              |
| Experiment          | 3         | 0.281   |              |
| Plant               | 3958      | < 0.001 |              |
| Accession           | 756       | < 0.001 | 6.1%         |
| Isolate             | 1232      | < 0.001 | 10.0%        |
| Accession:Isolate   | 1084      | < 0.001 | 8.8%         |
| <b>Eccentricity</b> |           |         |              |
| Experiment          | 0.00070   | 0.842   |              |
| Plant               | 13.04996  | 0.003   |              |
| Accession           | 2.34077   | 0.008   | 4.3%         |
| Isolate             | 0.00387   | 0.974   | <0.1%        |
| Accession:Isolate   | 6.00843   | 0.022   | 11.1%        |

605

606

607

608

609

610

611

612

613

614

615 **TABLE 2 – GO Categories enrichment**

616 The table displays the top ten enrichment categories (biological processes) associated with each  
 617 of the four lesion traits.

| GO.ID      | Term                                                | p        | Trait        |
|------------|-----------------------------------------------------|----------|--------------|
| GO:0006952 | defense response                                    | 1.40E-05 | Size         |
| GO:1901264 | carbohydrate derivative transport                   | 0.0003   | Size         |
| GO:0009617 | response to bacterium                               | 0.0007   | Size         |
| GO:0006749 | glutathione metabolic process                       | 0.0027   | Size         |
| GO:0009556 | microsporogenesis                                   | 0.0028   | Size         |
| GO:0006897 | endocytosis                                         | 0.0043   | Size         |
| GO:0030029 | actin filament-based process                        | 0.0048   | Size         |
| GO:0048236 | plant-type spore development                        | 0.0050   | Size         |
| GO:0072523 | purine-containing compound catabolic process        | 0.0061   | Size         |
| GO:1903409 | reactive oxygen species biosynthetic process        | 0.0081   | Size         |
| GO:0009910 | negative regulation of flower development           | 0.0011   | Eccentricity |
| GO:2000242 | negative regulation of reproductive process         | 0.0015   | Eccentricity |
| GO:0006349 | regulation of gene expression by genetic imprinting | 0.0021   | Eccentricity |
| GO:0071514 | genetic imprinting                                  | 0.0021   | Eccentricity |
| GO:0052386 | cell wall thickening                                | 0.0055   | Eccentricity |
| GO:0052543 | callose deposition in cell wall                     | 0.0055   | Eccentricity |
| GO:0009617 | response to bacterium                               | 0.0093   | Eccentricity |
| GO:0010150 | leaf senescence                                     | 0.0093   | Eccentricity |
| GO:0006821 | chloride transport                                  | 0.0107   | Eccentricity |
| GO:0015700 | arsenite transport                                  | 0.0107   | Eccentricity |
| GO:0006952 | defense response                                    | 0.0002   | Green        |
| GO:0010492 | maintenance of shoot apical meristem identity       | 0.0046   | Green        |
| GO:0002218 | activation of innate immune response                | 0.0051   | Green        |
| GO:0002253 | activation of immune response                       | 0.0051   | Green        |
| GO:0042742 | defense response to bacterium                       | 0.00520  | Green        |
| GO:0009617 | response to bacterium                               | 0.0068   | Green        |
| GO:0006928 | movement of cell or subcellular component           | 0.0092   | Green        |
| GO:0030048 | actin filament-based movement                       | 0.0092   | Green        |
| GO:0034614 | cellular response to reactive oxygen species        | 0.0093   | Green        |
| GO:0048236 | plant-type spore development                        | 0.0095   | Green        |
| GO:0006952 | defense response                                    | 0.0002   | Yellow       |
| GO:0016568 | chromatin modification                              | 0.0011   | Yellow       |
| GO:0044699 | single-organism process                             | 0.0012   | Yellow       |
| GO:0009625 | response to insect                                  | 0.0021   | Yellow       |
| GO:0044710 | single-organism metabolic process                   | 0.0022   | Yellow       |
| GO:0006325 | chromatin organization                              | 0.0029   | Yellow       |
| GO:0016569 | covalent chromatin modification                     | 0.0033   | Yellow       |
| GO:0009809 | lignin biosynthetic process                         | 0.0039   | Yellow       |
| GO:0042886 | amide transport                                     | 0.0039   | Yellow       |
| GO:0006857 | oligopeptide transport                              | 0.0045   | Yellow       |

618



**TABLE 3. Candidate Gene Assessment**

The table shows the validation tests on mutants in 23 potential candidate genes for each of the four measures of lesion formation: size, yellowness, greenness and eccentricity. The # of SNPs classified as significant above the 95 percentile threshold for that trait for that gene are shown as well as the significance of the difference between the insertion mutant and WT across all *B. cinerea* isolates (P – Plant) or an interaction with *B. cinerea* isolates (P – Plant:Isolate). Significance was tested using the models mentioned in the Method section. Nominal p-values between 0.1 and 0.05 are provided if at least one other trait showed significance below 0.05.

| AGI       | Gene      | Mutant              | #SNPs in coding region | Size                   |           |                    | Yellow                 |           |                    | Green                  |           |                    | Eccentricity           |           |                    |
|-----------|-----------|---------------------|------------------------|------------------------|-----------|--------------------|------------------------|-----------|--------------------|------------------------|-----------|--------------------|------------------------|-----------|--------------------|
|           |           |                     |                        | # unique SNPs above 95 | P - Plant | P - Plant: Isolate | # unique SNPs above 95 | P - Plant | P - Plant: Isolate | # unique SNPs above 95 | P - Plant | P - Plant: Isolate | # unique SNPs above 95 | P - Plant | P - Plant: Isolate |
| AT2G25540 | CESA10    | cesA10-1            | 11                     | 2                      | 0.005     | NS                 | 4                      | 0.053     | NS                 | 2                      | NS        | NS                 | 3                      | NS        | NS                 |
| AT2G39940 | COI1      | coi1-1              | 4                      | 0                      | < 0.001   | 0.096              | 4                      | < 0.001   | NS                 | 0                      | < 0.001   | NS                 | 0                      | NS        | NS                 |
| AT1G01060 | LHY       | lhy-20              | 2                      | 2                      | 0.006     | 0.093              | 2                      | NS        | NS                 | 2                      | 0.028     | 0.014              | 1                      | NS        | NS                 |
| AT3G26830 | PAD3      | pad3-1              | 1                      | 1                      | < 0.001   | 0.014              | 0                      | 0.004     | NS                 | 0                      | 0.008     | 0.069              | 0                      | NS        | NS                 |
| AT3G52430 | PAD4      | pad4-1              | 6                      | 0                      | 0.002     | 0.062              | 0                      | NS        | NS                 | 1                      | 0.010     | 0.019              | 4                      | NS        | NS                 |
| AT4G39350 | CESA2     | CS818491            | 8                      | 3                      | 0.020     | NS                 | 2                      | NS        | NS                 | 2                      | 0.067     | NS                 | 0                      | 0.090     | NS                 |
| AT1G22070 | TGA3      | tga3-2              | 1                      | 0                      | NS        | NS                 | 0                      | NS        | NS                 | 0                      | NS        | NS                 | 1                      | NS        | NS                 |
| AT4G17010 | AT4G17010 | CS861804            | 7                      | 3                      | NS        | NS                 | 4                      | 0.048     | NS                 | 2                      | NS        | NS                 | 1                      | 0.020     | NS                 |
| AT1G14690 | MAP65     | CS872894            | 10                     | 0                      | NS        | NS                 | 0                      | NS        | 0.076              | 0                      | NS        | NS                 | 0                      | NS        | NS                 |
| AT4G01883 | -         | CS67496             | 6                      | 0                      | 0.083     | NS                 | 0                      | NS        | NS                 | 2                      | 0.056     | NS                 | 0                      | 0.043     | NS                 |
| AT4G14420 | AT4G14420 | N508498             | 6                      | 2                      | 0.046     | NS                 | 1                      | NS        | NS                 | 2                      | 0.003     | NS                 | 2                      | NS        | NS                 |
| AT4G14400 | ACD6      | N559132             | 20                     | 3                      | NS        | NS                 | 5                      | NS        | NS                 | 15                     | 0.047     | NS                 | 0                      | NS        | NS                 |
| AT4G14368 | -         | N574598             | 16                     | 3                      | NS        | NS                 | 0                      | NS        | NS                 | 6                      | NS        | NS                 | 0                      | NS        | NS                 |
| AT1G31260 | ZIP10     | N604586             | 9                      | 5                      | NS        | NS                 | 3                      | NS        | NS                 | 0                      | NS        | NS                 | 6                      | NS        | NS                 |
| AT4G01860 | -         | N606172             | 13                     | 1                      | NS        | NS                 | 0                      | NS        | NS                 | 6                      | NS        | NS                 | 0                      | NS        | NS                 |
| AT2G32150 | -         | N640067             | 6                      | 0                      | NS        | NS                 | 0                      | NS        | NS                 | 1                      | NS        | NS                 | 0                      | NS        | NS                 |
| AT4G01880 | -         | CS857701<br>N608769 | 4                      | 0                      | 0.012     | NS                 | 1                      | 0.037     | NS                 | 1                      | 0.079     | NS                 | 0                      | NS        | NS                 |
| AT3G46640 | LUX       | lux                 | 5                      | 0                      | NS        | NS                 | 0                      | NS        | NS                 | 4                      | NS        | NS                 | 0                      | 0.046     | NS                 |
| AT3G45780 | PHOT1     | phot1               | 6                      | 3                      | NS        | 0.052              | 1                      | NS        | NS                 | 5                      | NS        | NS                 | 0                      | NS        | NS                 |
| AT4G18130 | PHYE      | phyE-2              | 3                      | 3                      | 0.002     | NS                 | 0                      | 0.024     | NS                 | 0                      | NS        | NS                 | 0                      | NS        | NS                 |
| AT4G39030 | SID1      | sid1                | 9                      | 0                      | NS        | 0.014              | 0                      | NS        | NS                 | 8                      | NS        | NS                 | 0                      | NS        | NS                 |
| AT5G67370 | CGLD27    | N529971             | 4                      | 0                      | NS        | NS                 | 3                      | NS        | NS                 | 1                      | NS        | NS                 | 0                      | NS        | NS                 |
| AT5G45950 | -         | N582692             | 5                      | 1                      | NS        | NS                 | 4                      | NS        | NS                 | 0                      | NS        | NS                 | 0                      | NS        | NS                 |
| AT1G20910 | -         | N641443             | 5                      | 0                      | NS        | 0.023              | 0                      | NS        | NS                 | 5                      | NS        | NS                 | 1                      | NS        | NS                 |
| AT5G13550 | SULTR4;1  | N662135             | 5                      | 0                      | NS        | NS                 | 0                      | NS        | NS                 | 0                      | NS        | NS                 | 5                      | 0.094     | NS                 |

## Figure Legends

### FIGURE 1. Illustration of different lesion traits

The six *A. thaliana* leaves infected with *B. cinerea* represent differing combinations of lesion traits observed. Lesions can be more circular or more eccentric, with pointed ends growing along the mid-vein of the leaf. Greenness and yellowness of both within the lesion and surrounding tissue is also highly variable. The water soaked greyish sectors represent the actual infected lesion.

- Large eccentric lesion with enhanced senescence
- Moderate eccentric lesion with low senescence
- Small lesion with large senescence
- Moderate circular lesion with moderate senescence
- Small lesion with moderate senescence
- Moderate circular lesion with large senescence

### FIGURE 2. Hierarchical cluster analysis of lesion traits

The heat map shows the collection of 75 lesion measurements of the four *B. cinerea* isolates (columns) on the collection of 96 *A. thaliana* accessions (rows). Labeled lines show lesion size, yellowness, greenness and eccentricity for the *B. cinerea* BO5.10 isolate.

### FIGURE 3. Isolate dependency of Trait correlations across the isolates

ANCOVA was used to test for correlations between each pair of traits across the 96 *A. thaliana* isolates using each of the four different *B. cinerea* isolates. Scatter plots with 95% confidence interval for the trait correlation in each isolate are shown on the left half of the plot. The diagonal shows the distribution of the specific trait across the four *B. cinerea* isolates. The right hand tables show the p-values for the trait-trait correlations, *B. cinerea* isolate dependency of these correlations, and the interaction of *B. cinerea* isolate on the trait-trait correlation (Int) using the following model). The estimated slopes for each trait-trait interaction for each *B. cinerea* isolate are shown by the colored text.

### FIGURE 4. Lesion size GWAS for four *B. cinerea* isolates

Manhattan plots showing lesion size trait GWAS results, as measured on four *B. cinerea* isolates: a, Apple517; b, B05.10; c, Supersteak; and d, UKRazz. The horizontal red-line shows the significance threshold as estimated by permutation.

### FIGURE 5. Venn diagram of genes found in GWA mapping

A Venn diagram of the candidate *A. thaliana* genes found to associate with each lesion trait via GWA. The number of genes listed for each lesion trait reflects the number of genes with two or more SNPs above the 95<sup>th</sup> percentile threshold for that particular trait.

### FIGURE 6. Haplotype diversity effects on trait to genotype linkages using AT4G17010

a) Plot of z-scaled SNP effect size across all four *B. cinerea* isolates on lesion yellowness within 1000bp of the AT4G17010 coding region (represented in blue blocks) of AT4G17010. The arrow indicates the transcriptional start site. The horizontal orange lines indicate the positive and

negative permutation thresholds for the *B. cinerea* isolate Apple517. The letters show the SNPs that are significantly associated with lesion yellowness in *B. cinerea* Apple517.

b) Hierarchical clustering of 95 *A. thaliana* accessions based on SNPs within AT4G17010. Haplotypes are assigned into five major groups, denoted by Roman numerals. Light grey indicates the SNP is the Col-0 allele while dark grey is the opposite allele. The SNPs are presented in their genomic order rather than the haplotype grouped structure.

c) Distributions of lesion yellowness across the *A. thaliana* accessions infected with *B. cinerea* Apple517. The *A. thaliana* accessions are grouped by approximate SNP haplotypes in b. The model corrected mean value of lesion yellowness for *A. thaliana* reference accession Col-0 was 0.545. Significance differences between the groups are shown by letters.

### **FIGURE 7 – Lesion traits affected by T-DNA insertional mutants**

A Venn diagram showing the lesion traits significantly affected by each of the T-DNA knockout mutants in comparison to the wildtype background. The gene identifiers are located within the appropriate section of the diagram showing all the phenotypes altered by mutations in that gene.

## **Supplemental Materials**

### **Figure S1: Hierarchical Cluster Analysis of Lesion Traits**

Hierarchical cluster analysis of the a) four traits chosen to represent broad visual aspects of lesions, across the four pathogen isolates. b) Detail showing only color and shape traits illustrates relatedness and variation across accessions and isolates.

### **Figure S2: Lesion Greenness Manhattan Plots**

Manhattan plots showing lesion greenness trait GWAS results, as measured on four *B. cinerea* isolates: a, Apple517; b, B05.10; c, Supersteak; and d, UKRazz. The horizontal red-line shows the significance threshold as estimated by permutation.

### **Figure S3: Lesion Yellowness and Eccentricity Shape Manhattan Plots for Apple517**

Manhattan plots showing lesion yellowness (a) and eccentricity trait (b) GWAS results for Apple517. There were no significant SNPs identified for the other isolates. The horizontal red-line shows the significance threshold as estimated by permutation.

**Table S1. LSMeans for all measured lesion traits.** The model corrected mean value for all 75 measures lesion traits across all accessions for all isolates.

**Table S2. GO Enrichment Test using the 200 candidate genes associated with all four lesion Traits.** Annotated shows the total number of genes in the genome for the given term. Significant shows the number of candidate genes with this term and Expected is the number expected by random chance. Classic Fisher is the p-value for enrichment of this term.

**Table S3. Lesion Area GWA**

Presented are the estimated effect sizes for all SNPs using lesion area for each isolate. The absolute value of the permutation estimated effect size are shown to the right for each isolate.

**Table S4. Lesion Greenness GWA**

Presented are the estimated effect sizes for all SNPs using lesion greenness for each isolate. The absolute value of the permutation estimated effect size are shown to the right for each isolate.

**Table S5. Lesion Yellowness GWA**

Presented are the estimated effect sizes for all SNPs using lesion yellowness for each isolate. The absolute value of the permutation estimated effect size are shown to the right for each isolate.

**Table S6. Lesion Eccentricity GWA**

Presented are the estimated effect sizes for all SNPs using lesion eccentricity for each isolate. The absolute value of the permutation estimated effect size are shown to the right for each isolate.

## References

- Agrios, G.** (2005). *Plant Pathology*. (Elsevier Academic Press).
- Aguileta, G., Lengelle, J., Chiapello, H., Giraud, T., Viaud, M., Fournier, E., Rodolphe, F., Marthey, S., Ducasse, A., Gendraul, A., Poulain, J., Wincker, P., and Gout, L.** (2012). Genes under positive selection in a model plant pathogenic fungus, *Botrytis*. *Infection Genetics and Evolution* **12**, 987-996.
- Alfonso, C., Raposo, R., and Melgarejo, P.** (2000). Genetic diversity in *Botrytis cinerea* populations on vegetable crops in greenhouses in south-eastern Spain. *Plant Pathology* **49**, 243-251.
- Alonso-Blanco, C., Andrade, J., Becker, C., Bemm, F., Bergelson, J., Borgwardt, K.M., Cao, J., Chae, E., Dezwaan, T.M., Ding, W., Ecker, J.R., Exposito-Alonso, M., Farlow, A., Fitz, J., Gan, X.C., Grimm, D.G., Hancock, A.M., Henz, S.R., Holm, S., Horton, M., Jarsulic, M., Kerstetter, R.A., Korte, A., Korte, P., Lanz, C., Lee, C.R., Meng, D.Z., Michael, T.P., Mott, R., Mulyati, N.W., Nagele, T., Nagler, M., Nizhynska, V., Nordborg, M., Novikova, P.Y., Pico, F.X., Platzer, A., Rabanal, F.A., Rodriguez, A., Rowan, B.A., Salome, P.A., Schmid, K.J., Schmitz, R.J., Seren, U., Sperone, F.G., Sudkamp, M., Svardal, H., Tanzer, M.M., Todd, D., Volchenbom, S.L., Wang, C.M., Wang, G., Wang, X., Weckwerth, W., Weigel, D., Zhou, X.F., and Genomes, C.** (2016). 1,135 Genomes Reveal the Global Pattern of Polymorphism in *Arabidopsis thaliana*. *Cell* **166**, 481-491.
- Amselem, J., Cuomo, C.A., van Kan, J.A.L., Viaud, M., Benito, E.P., Couloux, A., Coutinho, P.M., de Vries, R.P., Dyer, P.S., Fillinger, S., Fournier, E., Gout, L., Hahn, M., Kohn, L.M., Lapalu, N., Plummer, K.M., Pradier, J.M., Quevillon, E., Sharon, A., Simon, A., ten Have, A., Tudzynski, B., Tudzynski, P., Wincker, P., Andrew, M., Anthouard, V., Beever, R.E., Beffa, R., Benoit, I., Bouzid, O., Brault, B., Chen, Z.H., Choquer, M., Collemare, J., Cotton, P., Danchin, E.G., Da Silva, C., Gautier, A., Giraud, C., Giraud, T., Gonzalez, C., Grossetete, S., Guldener, U., Henrissat, B., Howlett, B.J., Kodira, C., Kretschmer, M., Lappartient, A., Leroch, M., Levis, C., Mauceli, E., Neuveglise, C., Oeser, B., Pearson, M., Poulain, J., Poussereau, N., Quesneville, H., Rasclé, C., Schumacher, J., Segurens, B., Sexton, A., Silva, E., Sirven, C., Soanes, D.M., Talbot, N.J., Templeton, M., Yandava, C., Yarden, O., Zeng, Q.D., Rollins, J.A., Lebrun, M.H., and Dickman, M.** (2011). Genomic Analysis of the Necrotrophic Fungal Pathogens *Sclerotinia sclerotiorum* and *Botrytis cinerea*. *Plos Genetics* **7**.
- Attaran, E., Major, I.T., Cruz, J.A., Rosa, B.A., Koo, A.J.K., Chen, J., Kramer, D.M., He, S.Y., and Howe, G.A.** (2014). Temporal Dynamics of Growth and Photosynthesis Suppression in Response to Jasmonate Signaling. *Plant physiology* **165**, 1302-1314.
- Atwell, S., Corwin, J.A., Soltis, N.E., Subedy, A., Denby, K.J., and Kliebenstein, D.J.** (2015). Whole genome resequencing of *Botrytis cinerea* isolates identifies high levels of standing diversity. *Frontiers in Microbiology* **6**.
- Atwell, S., Huang, Y., Vilhjalmsen, B.J., Willems, G., Horton, M., Li, Y., Meng, D., Platt, A., Tarone, A., Hu, T.T., Jiang, R., Mulyati, N.W., Zhang, X., Ali Amer, M., Baxter, I.R., Brachi, B., Chory, J., Dean, C., Debieu, M., de Meaux, J., Ecker, J.R., Faure, n., Kniskern, J.M., Jones, J.D.G., Michael, T.P., Nemri, A., Roux, F., Salt, D.E., Tang, C.L., Todesco, M., Traw, M.B., Weigel, D., Marjoram, P., Borevitz, J.O., Bergelson, J., and Nordborg, M.**

- (2010). Genome-wide association study of 107 phenotypes in a common set of *Arabidopsis thaliana* in-bred lines. *Nature* **465**, 627-631.
- Barbedo, J.G.A.** (2017). A new automatic method for disease symptom segmentation in digital photographs of plant leaves. *European Journal of Plant Pathology* **147**, 349-364.
- Bethke, G., Thao, A., Xiong, G.Y., Li, B.H., Soltis, N.E., Hatsugai, N., Hillmer, R.A., Katagiri, F., Kliebenstein, D.J., Pauly, M., and Glazebrook, J.** (2016). Pectin Biosynthesis Is Critical for Cell Wall Integrity and Immunity in *Arabidopsis thaliana*. *Plant Cell* **28**, 537-556.
- Bock, C.H., Poole, G.H., Parker, P.E., and Gottwald, T.R.** (2010). Plant Disease Severity Estimated Visually, by Digital Photography and Image Analysis, and by Hyperspectral Imaging. *Critical Reviews in Plant Sciences* **29**, 59-107.
- Briggs, W.R., and Christie, J.M.** (2002). Phototropins 1 and 2: versatile plant blue-light receptors. *Trends in plant science* **7**, 204-210.
- Campos, M.L., Yoshida, Y., Major, I.T., Ferreira, D.D., Weraduwage, S.M., Froehlich, J.E., Johnson, B.F., Kramer, D.M., Jander, G., Sharkey, T.D., and Howe, G.A.** (2016). Rewiring of jasmonate and phytochrome B signalling uncouples plant growth-defense tradeoffs. *Nature Communications* **7**.
- Cantu, D., Vicente, A.R., Greve, L.C., Dewey, F.M., Bennett, A.B., Labavitch, J.M., and Powell, A.L.T.** (2008). The intersection between cell wall disassembly, ripening, and fruit susceptibility to *Botrytis cinerea*. *Proceedings of the National Academy of Sciences of the United States of America* **105**, 859-864.
- Cao, J., Schneeberger, K., Ossowski, S., Gunther, T., Bender, S., Fitz, J., Koenig, D., Lanz, C., Stegle, O., Lippert, C., Wang, X., Ott, F., Muller, J., Alonso-Blanco, C., Borgwardt, K., Schmid, K.J., and Weigel, D.** (2011). Whole-genome sequencing of multiple *Arabidopsis thaliana* populations. *Nat Genet* **43**, 956-U960.
- Chan, E.K.F., Rowe, H.C., Corwin, J.A., Joseph, B., and Kliebenstein, D.J.** (2011). Combining Genome-Wide Association Mapping and Transcriptional Networks to Identify Novel Genes Controlling Glucosinolates in *Arabidopsis thaliana*. *Plos Biol* **9**.
- Choquer, M., Fournier, E., Kunz, C., Levis, C., Pradier, J.M., Simon, A., and Viaud, M.** (2007). *Botrytis cinerea* virulence factors: new insights into a necrotrophic and polyphageous pathogen. *Fems Microbiology Letters* **277**, 1-10.
- Clack, T., Mathews, S., and Sharrock, R.A.** (1994). THE PHYTOCHROME APOPROTEIN FAMILY IN ARABIDOPSIS IS ENCODED BY 5 GENES - THE SEQUENCES AND EXPRESSION OF PHYD AND PHYE. *Plant molecular biology* **25**, 413-427.
- Corwin, J.A., and Kliebenstein, D.J.** (2017). Quantitative Resistance: More Than Just Perception of a Pathogen. *Plant Cell* **29**, 655-665.
- Corwin, J.A., Subedy, A., Eshbaugh, R., and Kliebenstein, D.J.** (2016a). Expansive Phenotypic Landscape of *Botrytis cinerea* Shows Differential Contribution of Genetic Diversity and Plasticity. *Molecular Plant-Microbe Interactions* **29**, 287-298.
- Corwin, J.A., Copeland, D., Feusier, J., Subedy, A., Eshbaugh, R., Palmer, C., Maloof, J., and Kliebenstein, D.J.** (2016b). The Quantitative Basis of the *Arabidopsis* Innate Immune System to Endemic Pathogens Depends on Pathogen Genetics. *Plos Genetics* **12**.
- Denby, K.J., Kumar, P., and Kliebenstein, D.J.** (2004). Identification of *Botrytis cinerea* susceptibility loci in *Arabidopsis thaliana*. *Plant J* **38**, 473-486.

- Devlin, P.F., Patel, S.R., and Whitelam, G.C.** (1998). Phytochrome E influences internode elongation and flowering time in Arabidopsis. *Plant Cell* **10**, 1479-1487.
- Elad, Y., Pertot, I., Cotes Prado, A.M., and Stewart, A.** (2016). Plant Hosts of Botrytis spp. In *Botrytis – the Fungus, the Pathogen and its Management in Agricultural Systems*, S. Fillinger and Y. Elad, eds (Cham: Springer International Publishing), pp. 413-486.
- Failmezger H, Y.Y., Rueda O, Markowitz F.** (2010). CRImage: CRImage a package to classify cells and calculate tumour cellularity.
- Ferrari, S., Vairo, D., Ausubel, F.M., Cervone, F., and De Lorenzo, G.** (2003). Tandemly duplicated Arabidopsis genes that encode polygalacturonase-inhibiting proteins are regulated coordinately by different signal transduction pathways in response to fungal infection. *Plant Cell* **15**, 93-106.
- Francisco, M., Joseph, B., Caligagan, H., Li, B.H., Corwin, J.A., Lin, C., Kerwin, R.E., Burow, M., and Kliebenstein, D.J.** (2016). Genome Wide Association Mapping in Arabidopsis thaliana Identifies Novel Genes Involved in Linking Allyl Glucosinolate to Altered Biomass and Defense. *Frontiers in Plant Science* **7**.
- Gan, X.C., Stegle, O., Behr, J., Steffen, J.G., Drewe, P., Hildebrand, K.L., Lyngsoe, R., Schultheiss, S.J., Osborne, E.J., Sreedharan, V.T., Kahles, A., Bohnert, R., Jean, G., Derwent, P., Kersey, P., Belfield, E.J., Harberd, N.P., Kemen, E., Toomajian, C., Kover, P.X., Clark, R.M., Ratsch, G., and Mott, R.** (2011). Multiple reference genomes and transcriptomes for Arabidopsis thaliana. *Nature* **477**, 419-423.
- Giraud, T., Fortini, D., Levis, C., Leroux, P., and Brygoo, Y.** (1997). RFLP markers show genetic recombination in Botryotinia fuckeliana (Botrytis cinerea) and transposable elements reveal two sympatric species. *Molecular Biology and Evolution* **14**, 1177-1185.
- Griebel, T., and Zeier, J.** (2008). Light regulation and daytime dependency of inducible plant defenses in Arabidopsis: Phytochrome signaling controls systemic acquired resistance rather than local defense. *Plant physiology* **147**, 790-801.
- Halliday, K.J., and Whitelam, G.C.** (2003). Changes in photoperiod or temperature alter the functional relationships between phytochromes and reveal roles for phyD and phyE. *Plant physiology* **131**, 1913-1920.
- Hazen, S.P., Schultz, T.F., Pruneda-Paz, J.L., Borevitz, J.O., Ecker, J.R., and Kay, S.A.** (2005). LUX ARRHYTHMO encodes a Myb domain protein essential for circadian rhythms. *Proceedings of the National Academy of Sciences of the United States of America* **102**, 10387-10392.
- Jarvis, W.R.** (1977). Botryotinia and Botrytis species : taxonomy, physiology, and pathogenicity : a guide to the literature. (Ottawa: Research Branch, Canada Dept. of Agriculture: obtainable from Information Division, Canada Dept. of Agriculture).
- Jones, J.D.G., and Dangl, J.L.** (2006). The plant immune system. *Nature* **444**, 323-329.
- Kataoka, T., Watanabe-Takahashi, A., Hayashi, N., Ohnishi, M., Mimura, T., Buchner, P., Hawkesford, M.J., Yamaya, T., and Takahashi, H.** (2004). Vacuolar sulfate transporters are essential determinants controlling internal distribution of sulfate in Arabidopsis. *Plant Cell* **16**, 2693-2704.
- Kazan, K., and Manners, J.M.** (2011). The interplay between light and jasmonate signalling during defence and development. *Journal of Experimental Botany* **62**, 4087-4100.

- Kliebenstein, D.J., Rowe, H.C., and Denby, K.J.** (2005). Secondary metabolites influence Arabidopsis/Botrytis interactions: variation in host production and pathogen sensitivity. *Plant Journal* **44**, 25-36.
- Kooke, R., Kruijer, W., Bours, R., Becker, F., Kuhn, A., van de Geest, H., Buntjer, J., Doeswijk, T., Guerra, J., Bouwmeester, H., Vreugdenhil, D., and Keurentjes, J.J.B.** (2016). Genome-Wide Association Mapping and Genomic Prediction Elucidate the Genetic Architecture of Morphological Traits in Arabidopsis. *Plant physiology* **170**, 2187-2203.
- Kretschmer, M., Leroch, M., Mosbach, A., Walker, A.-S., Fillinger, S., Mernke, D., Schoonbeek, H.-J., Pradier, J.-M., Leroux, P., De Waard, M.A., and Hahn, M.** (2009). Fungicide-Driven Evolution and Molecular Basis of Multidrug Resistance in Field Populations of the Grey Mould Fungus *Botrytis cinerea*. *Plos Pathogens* **5**.
- Kuska, M., Wahabzada, M., Leucker, M., Dehne, H.W., Kersting, K., Oerke, E.C., Steiner, U., and Mahlein, A.K.** (2015). Hyperspectral phenotyping on the microscopic scale: towards automated characterization of plant-pathogen interactions. *Plant methods* **11**.
- Laluk, K., and Mengiste, T.** (2010). Necrotroph attacks on plants: wanton destruction or covert extortion? *The Arabidopsis book / American Society of Plant Biologists* **8**, e0136.
- Leucker, M., Mahlein, A.K., Steiner, U., and Oerke, E.C.** (2016). Improvement of Lesion Phenotyping in *Cercospora beticola*-Sugar Beet Interaction by Hyperspectral Imaging. *Phytopathology* **106**, 177-184.
- Li, B., Hulin, M.T., Brain, P., Mansfield, J.W., Jackson, R.W., and Harrison, R.J.** (2015). Rapid, automated detection of stem canker symptoms in woody perennials using artificial neural network analysis. *Plant Methods* **11**.
- Long, Q., Rabanal, F.A., Meng, D.Z., Huber, C.D., Farlow, A., Platzer, A., Zhang, Q.R., Vilhjalmsson, B.J., Korte, A., Nizhynska, V., Voronin, V., Korte, P., Sedman, L., Mandakova, T., Lysak, M.A., Seren, U., Hellmann, I., and Nordborg, M.** (2013). Massive genomic variation and strong selection in *Arabidopsis thaliana* lines from Sweden. *Nat Genet* **45**, 884-U218.
- Lu, H., Salimian, S., Gamelin, E., Wang, G.Y., Fedorowski, J., LaCourse, W., and Greenberg, J.T.** (2009). Genetic analysis of *acd6-1* reveals complex defense networks and leads to identification of novel defense genes in *Arabidopsis*. *Plant Journal* **58**, 401-412.
- Mahlein, A.K., Steiner, U., Hillnhutter, C., Dehne, H.W., and Oerke, E.C.** (2012). Hyperspectral imaging for small-scale analysis of symptoms caused by different sugar beet diseases. *Plant Methods* **8**.
- Matsunaga, T.M., Ogawa, D., Taguchi-Shiobara, F., Ishimoto, M., Matsunaga, S., and Habu, Y.** (2017). Direct quantitative evaluation of disease symptoms on living plant leaves growing under natural light. *Breeding Science* **67**, 316-319.
- Mengiste, T., Laluk, K., and AbuQamar, S.** (2010). Mechanisms of Induced Resistance Against *B. cinerea*. *Plant Path* **21st**, 13-30.
- Montes, J.M., Melchinger, A.E., and Reif, J.C.** (2007). Novel throughput phenotyping platforms in plant genetic studies. *Trends in plant science* **12**, 433-436.
- Muhlenbock, P., Szechynska-Hebda, M., Plaszczyca, M., Baudo, M., Mateo, A., Mullineaux, P.M., Parker, J.E., Karpinska, B., and Karpinski, S.** (2008). Chloroplast Signaling and LESION SIMULATING DISEASE1 Regulate Crosstalk between Light Acclimation and Immunity in *Arabidopsis*. (vol 20, pg 2339, 2008). *Plant Cell* **20**, 3480-3480.



- Mutka, A.M., and Bart, R.S.** (2015). Image-based phenotyping of plant disease symptoms. *Front Plant Sci* **5**.
- Nusinow, D.A., Helfer, A., Hamilton, E.E., King, J.J., Imaizumi, T., Schultz, T.F., Farre, E.M., and Kay, S.A.** (2011). The ELF4-ELF3-LUX complex links the circadian clock to diurnal control of hypocotyl growth. *Nature* **475**, 398-U161.
- Ossowski, S., Schneeberger, K., Clark, R.M., Lanz, C., Warthmann, N., and Weigel, D.** (2008). Sequencing of natural strains of *Arabidopsis thaliana* with short reads. *Genome Res* **18**, 2024-2033.
- Pau, G., Fuchs, F., Sklyar, O., Boutros, M., and Huber, W.** (2010). EBIImage-an R package for image processing with applications to cellular phenotypes. *Bioinformatics* **26**, 979-981.
- R Development Core Team.** (2016). R: A Language and Environment for Statistical Computing (Vienna, Austria: R Foundation for Statistical Computing).
- Rate, D.N., Cuenca, J.V., Bowman, G.R., Guttman, D.S., and Greenberg, J.T.** (1999). The Gain-of-Function *Arabidopsis* *acd6* Mutant Reveals Novel Regulation and Function of the Salicylic Acid Signaling Pathway in Controlling Cell Death, Defenses, and Cell Growth. *Plant Cell* **11**, 1695-1708.
- Rowe, H.C., and Kliebenstein, D.J.** (2008). Complex genetics control natural variation in *Arabidopsis thaliana* resistance to *Botrytis cinerea*. *Genetics* **180**, 2237-2250.
- Rowe, H.C., and Kliebenstein, D.J.** (2010). All Mold Is Not Alike: The Importance of Intraspecific Diversity in Necrotrophic Plant Pathogens. *Plos Pathog* **6**.
- Rowe, H.C., Walley, J.W., Corwin, J., Chan, E.K.-F., Dehesh, K., and Kliebenstein, D.J.** (2010). Deficiencies in jasmonate-mediated plant defense reveal quantitative variation in *Botrytis cinerea* pathogenesis. *PLoS Pathogens* **6**, e1000861.
- Sanchez-Lamas, M., Lorenzo, C.D., and Cerdan, P.D.** (2016). Bottom-up Assembly of the Phytochrome Network. *Plos Genetics* **12**.
- Schneeberger, K., Ossowski, S., Ott, F., Klein, J.D., Wang, X., Lanz, C., Smith, L.M., Cao, J., Fitz, J., Warthmann, N., Henz, S.R., Huson, D.H., and Weigel, D.** (2011). Reference-guided assembly of four diverse *Arabidopsis thaliana* genomes. *Proceedings of the National Academy of Sciences of the United States of America* **108**, 10249-10254.
- Schwanck, A.A., and Del Ponte, E.M.** (2016). Measuring lesion attributes and analysing their spatial patterns at the leaf scale using digital image analysis. *Plant Pathology* **65**, 1498-1508.
- Shen, X., Alam, M., Fikse, F., and Ronnegard, L.** (2013). A Novel Generalized Ridge Regression Method for Quantitative Genetics. *Genetics* **193**, 1255-1268.
- Song, J.T., Lu, H., McDowell, J.M., and Greenberg, J.T.** (2004). A key role for ALD1 in activation of local and systemic defenses in *Arabidopsis*. *Plant Journal* **40**, 200-212.
- Staats, M., van Baarlen, P., and van Kan, J.A.L.** (2005). Molecular phylogeny of the plant pathogenic genus *Botrytis* and the evolution of host specificity. *Molecular Biology and Evolution* **22**, 333-346.
- Stefanato, F.L., Abou-Mansour, E., Buchala, A., Kretschmer, M., Mosbach, A., Hahn, M., Bochet, C.G., Mettraux, J.P., and Schoonbeek, H.J.** (2009). The ABC transporter BcatrB from *Botrytis cinerea* exports camalexin and is a virulence factor on *Arabidopsis thaliana*. *Plant Journal* **58**, 499-510.

- Szechynska-Hebda, M., Kruk, J., Gorecka, M., Karpinska, B., and Karpinski, S.** (2010). Evidence for Light Wavelength-Specific Photoelectrophysiological Signaling and Memory of Excess Light Episodes in Arabidopsis. *Plant Cell* **22**, 2201-2218.
- Thomma, B., Eggermont, K., Penninckx, I., Mauch-Mani, B., Vogelsang, R., Cammue, B.P.A., and Broekaert, W.F.** (1998). Separate jasmonate-dependent and salicylate-dependent defense-response pathways in Arabidopsis are essential for resistance to distinct microbial pathogens. *Proc Natl Acad Sci U S A* **95**, 15107-15111.
- Thomma, B.P.H.J., Eggermont, K., Tierens, K.F.M.J., and Broekaert, W.F.** (1999). Requirement of functional ethylene-insensitive 2 gene for efficient resistance of Arabidopsis to infection by *Botrytis cinerea*. *Plant Physiol* **121**, 1093-1101.
- Vaczy, K.Z., Sandor, E., Karaffa, L., Fekete, E., Fekete, E., Arnyasi, M., Czeglédi, L., Kovics, G.J., Druzhinina, I.S., and Kubicek, C.P.** (2008). Sexual Recombination in the *Botrytis cinerea* Populations in Hungarian Vineyards. *Phytopathology* **98**, 1312-1319.
- Valiuskaite, A., Surviliene, E., and Baniulis, D.** (2010). Genetic diversity and pathogenicity traits of *Botrytis* spp. isolated from horticultural hosts. *Zemdirbyste* **97**, 85-90.
- Veronese, P., Nakagami, H., Bluhm, B., AbuQamar, S., Chen, X., Salmeron, J., Dietrich, R.A., Hirt, H., and Mengiste, T.** (2006). The membrane-anchored BOTRYTIS-INDUCED KINASE1 plays distinct roles in Arabidopsis resistance to necrotrophic and biotrophic pathogens. *Plant Cell* **18**, 257-273.
- Walters, D.R., McRoberts, N., and Fitt, B.D.** (2008). Are green islands red herrings? Significance of green islands in plant interactions with pathogens and pests. *Biol Rev Camb Philos Soc* **83**, 79-102.
- Windram, O., Madhou, P., McHattie, S., Hill, C., Hickman, R., Cooke, E., Jenkins, D.J., Penfold, C.A., Baxter, L., Breeze, E., Kiddle, S.J., Rhodes, J., Atwell, S., Kliebenstein, D.J., Kim, Y.S., Stegle, O., Borgwardt, K., Zhang, C.J., Tabrett, A., Legaie, R., Moore, J., Finkenshtadt, B., Wild, D.L., Mead, A., Rand, D., Beynon, J., Ott, S., Buchanan-Wollaston, V., and Denby, K.J.** (2012). Arabidopsis Defense against *Botrytis cinerea*: Chronology and Regulation Deciphered by High-Resolution Temporal Transcriptomic Analysis. *Plant Cell* **24**, 3530-3557.
- Zhao, Y.Y., Zhou, J., and Xing, D.** (2014). Phytochrome B-mediated activation of lipoxygenase modulates an excess red light-induced defence response in Arabidopsis. *J Exp Bot* **65**, 4907-4918.
- Zuber, H., Davidian, J.C., Wirtz, M., Hell, R., Belghazi, M., Thompson, R., and Gallardo, K.** (2010a). Sultra4;1 mutant seeds of Arabidopsis have an enhanced sulphate content and modified proteome suggesting metabolic adaptations to altered sulphate compartmentalization. *Bmc Plant Biology* **10**.
- Zuber, H., Davidian, J.C., Wirtz, M., Hell, R., Belghazi, M., Thompson, R., and Gallardo, K.** (2010b). Sultra4;1 mutant seeds of Arabidopsis have an enhanced sulphate content and modified proteome suggesting metabolic adaptations to altered sulphate compartmentalization. *BMC Plant Biol* **10**, 78.

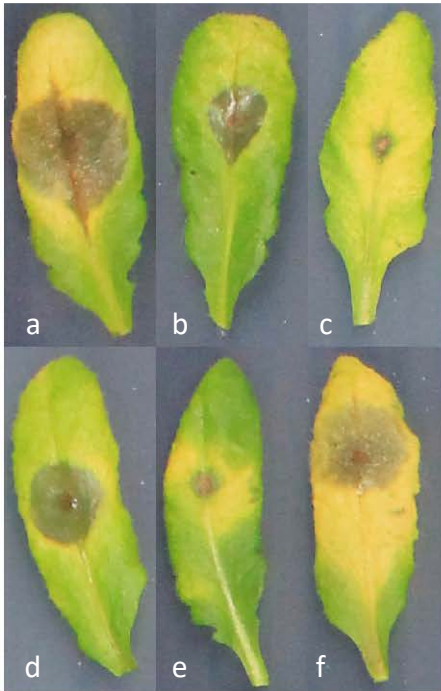

**FIGURE 1. Illustration of different lesion traits**

The six *A. thaliana* leaves infected with *B. cinerea* represent differing combinations of lesion traits observed. Lesions can be more circular or more eccentric, with pointed ends growing along the mid-vein of the leaf. Greenness and yellowness of both within the lesion and surrounding tissue is also highly variable. The water soaked greyish sectors represent the actual infected lesion.

- a. Large eccentric lesion with enhanced senescence
- b. Moderate eccentric lesion with low senescence
- c. Small lesion with large senescence
- d. Moderate circular lesion with moderate senescence
- e. Small lesion with moderate senescence
- f. Moderate circular lesion with large senescence

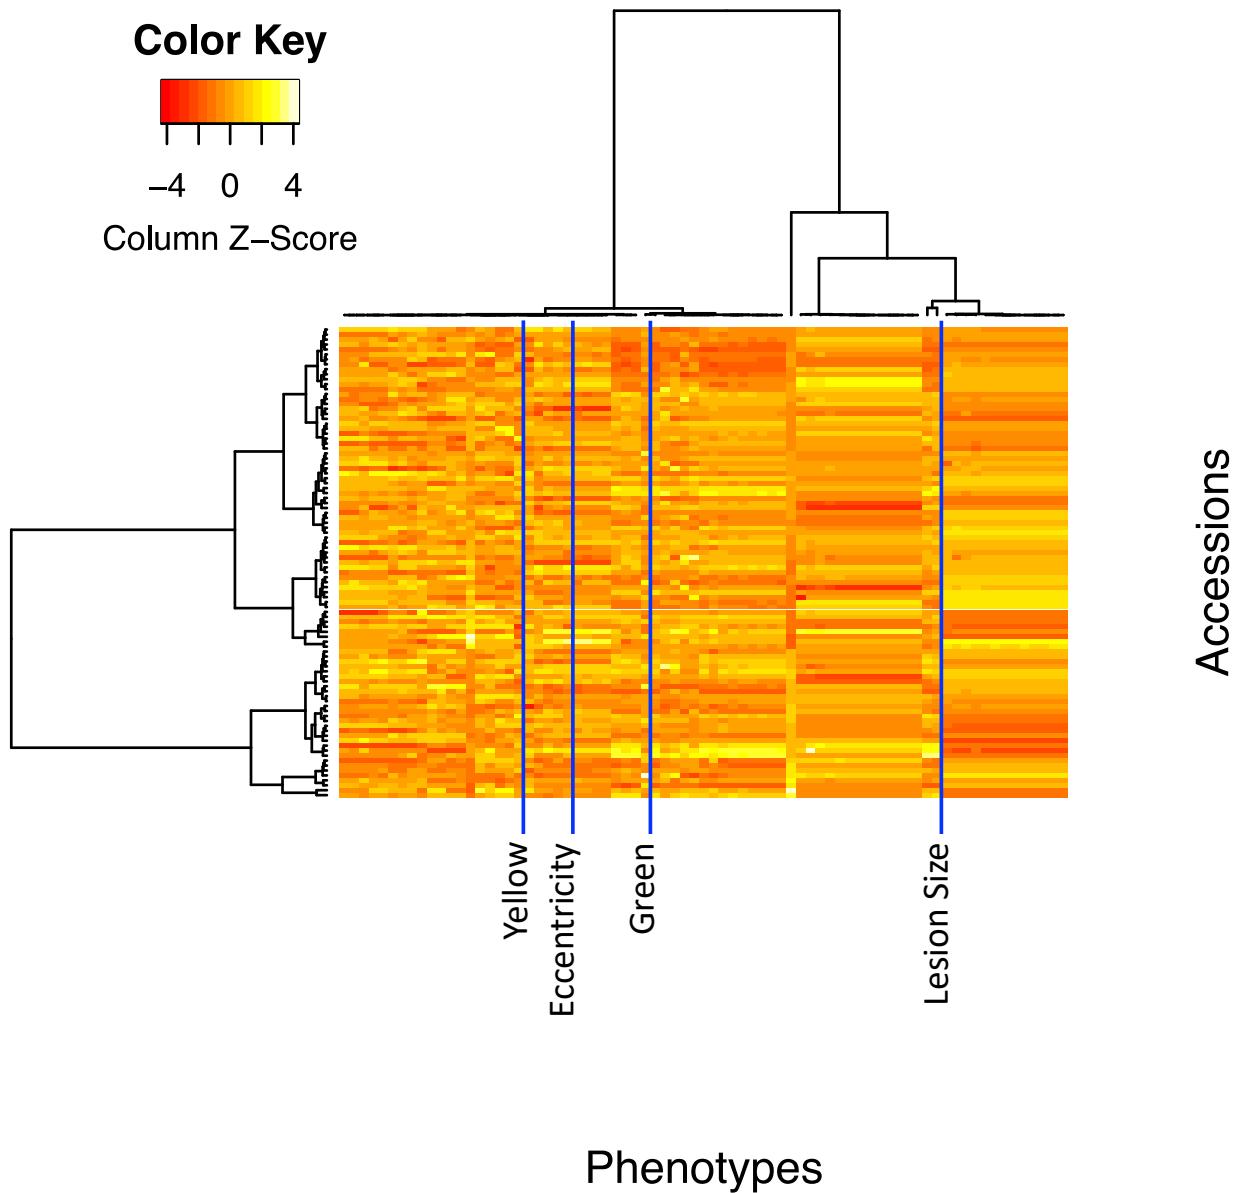

**FIGURE 2 – Hierarchical cluster analysis of lesion traits**

The heat map shows the collection of 75 lesion measurements of the four *B. cinerea* isolates (columns) on the collection of 96 *A. thaliana* accessions (rows). Labeled lines show lesion size, yellowness, greenness and eccentricity for the *B. cinerea* BO5.10 isolate.

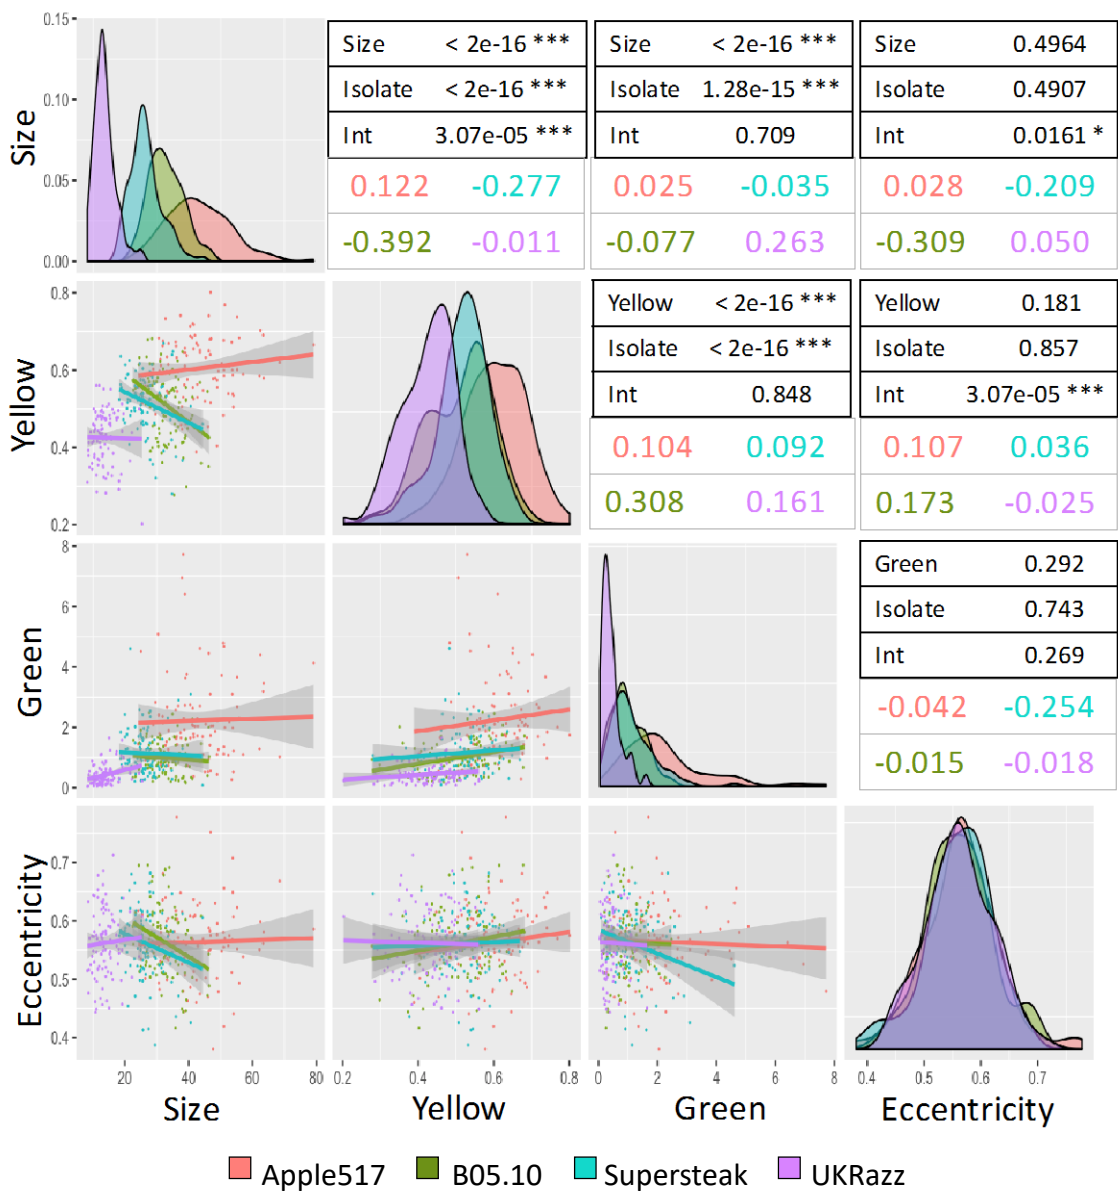

**FIGURE 3 – Isolate dependency of Ttait correlations across the isolates**

ANCOVA was used to test for correlations between each pair of traits across the 96 *A. thaliana* isolates using each of the four different *B. cinerea* isolates. Scatter plots with 95% confidence interval for the trait correlation in each isolate are shown on the left half of the plot. The diagonal shows the distribution of the specific trait across the four *B. cinerea* isolates. The right hand tables show the p-values for the trait-trait correlations, *B. cinerea* isolate dependency of these correlations, and the interaction of *B. cinerea* isolate on the trait-trait correlation (Int) using the following model). The estimated slopes for each trait-trait interaction for each *B. cinerea* isolate are shown by the colored text.

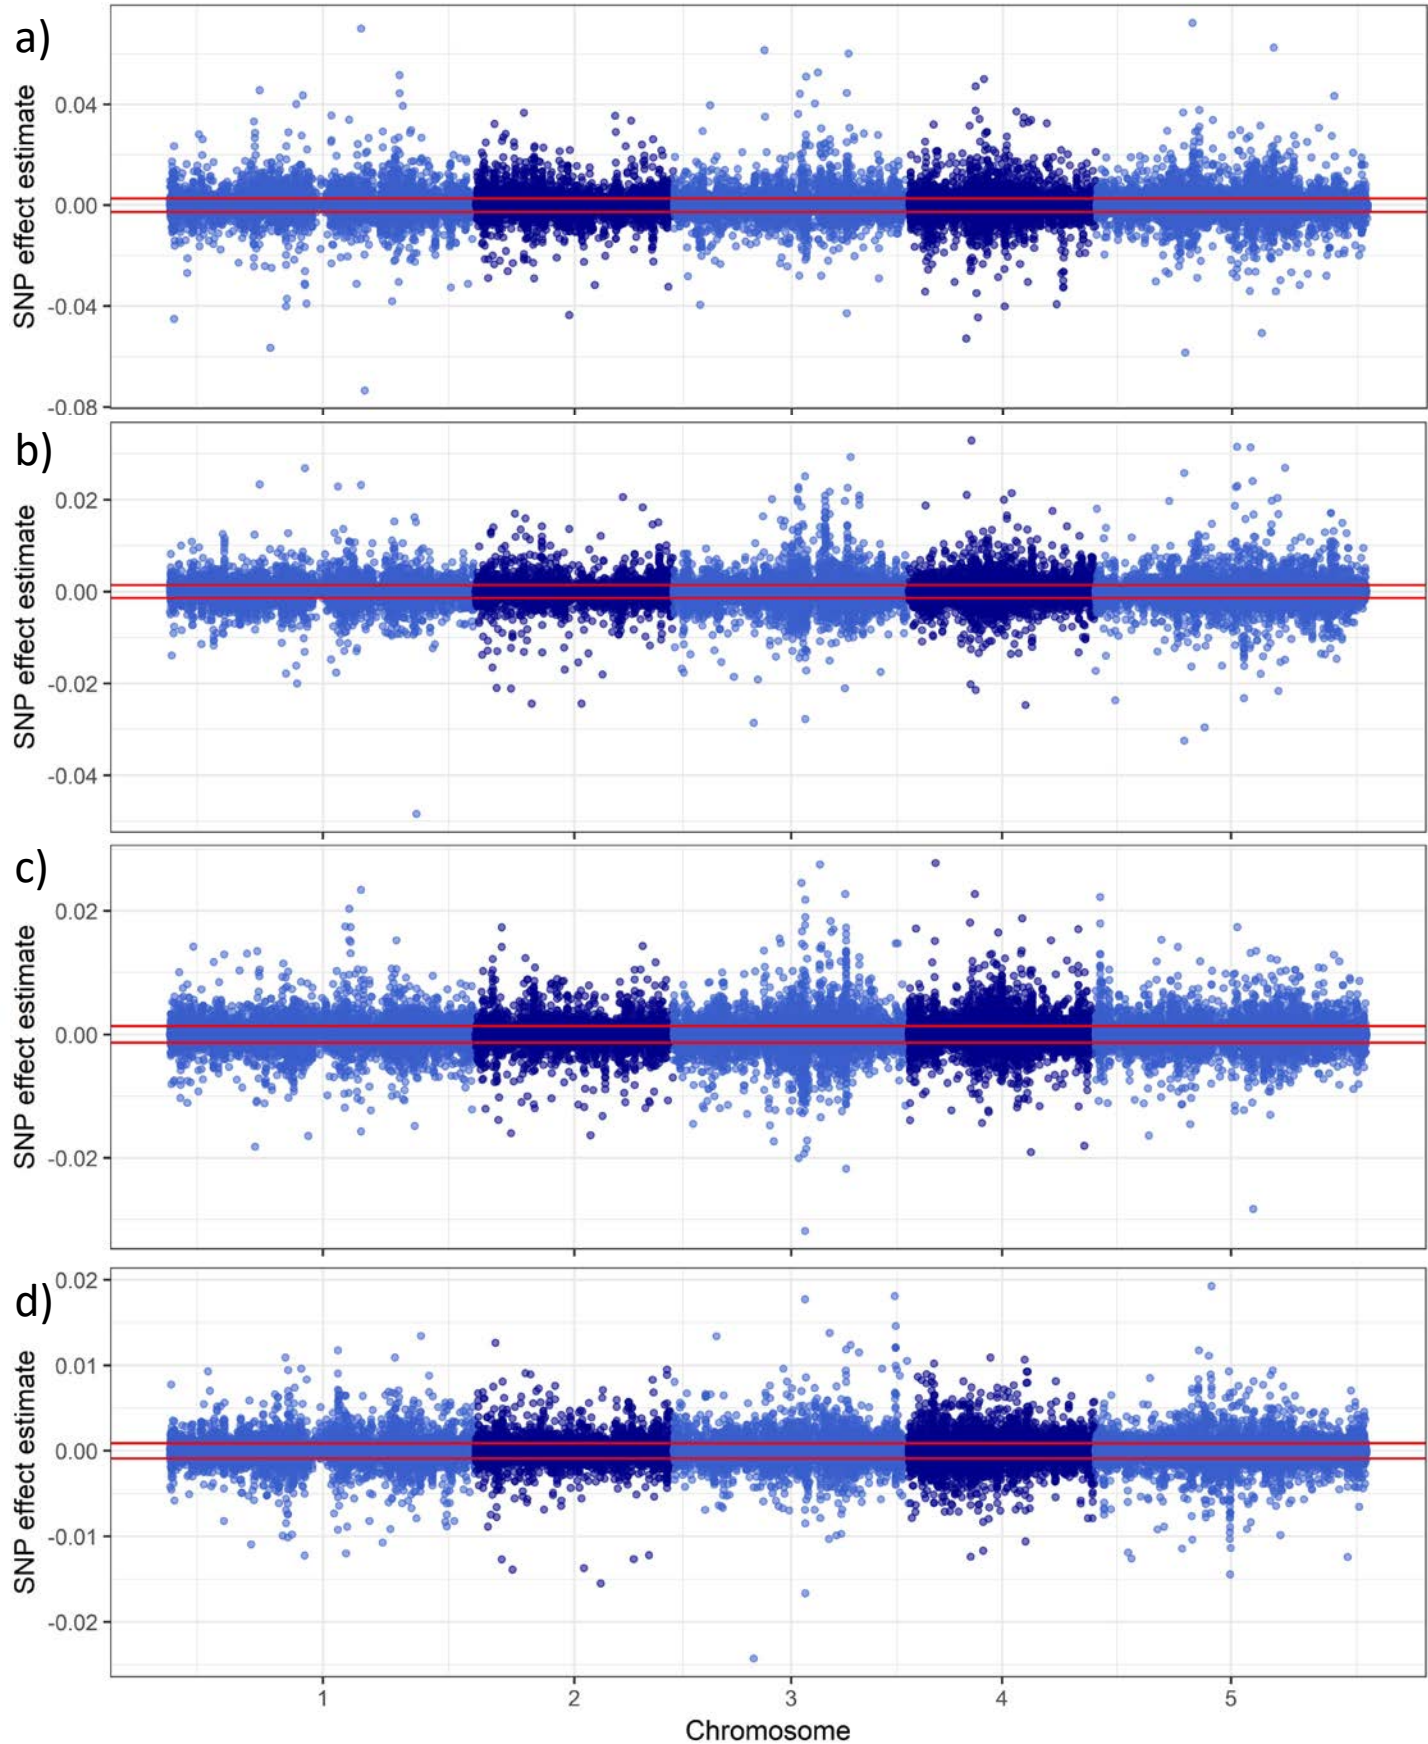

**FIGURE 4 – Lesion size GWAS for four *B. cinerea* isolates**

Manhattan plots showing the lesion size trait GWAS results, as measured on four *B. cinerea* isolates: a, Apple517; b, B05.10; c, Supersteak; and d, UKRazz. The horizontal red-line shows the significance threshold as estimated by permutation.

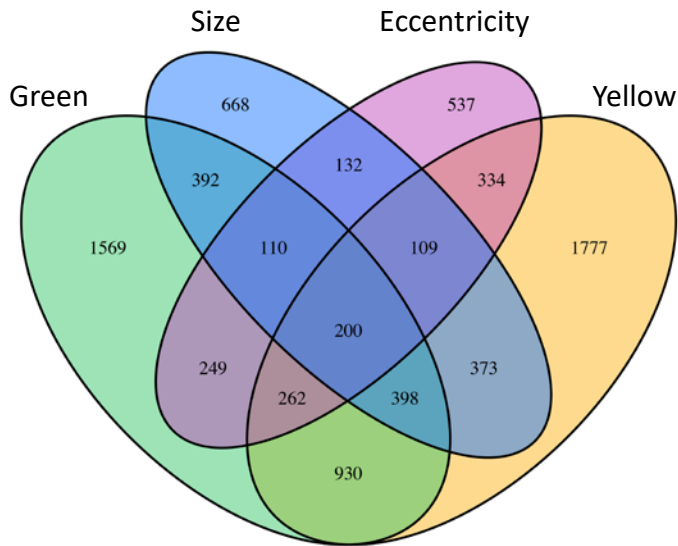

**FIGURE 5 – Venn diagram of genes found in GWA mapping**

A Venn diagram of the candidate *A. thaliana* genes found to associate with each lesion trait via GWA. The number of genes listed for each lesion trait reflects the number of genes with two or more SNPs above the 95<sup>th</sup> percentile threshold for that particular trait.

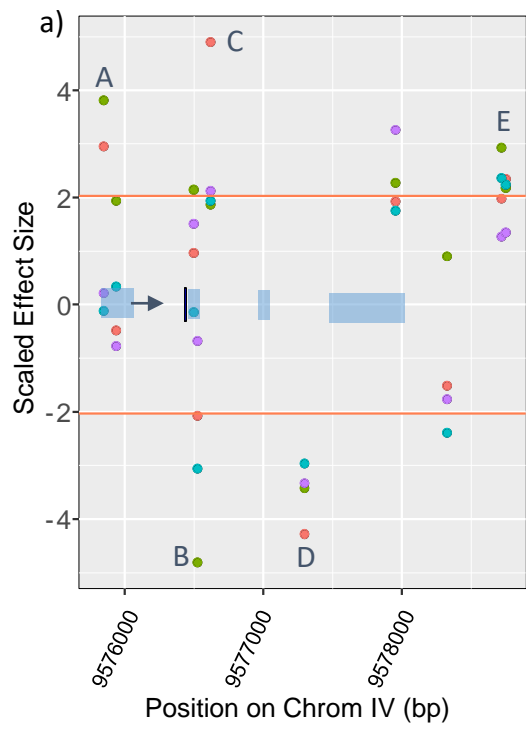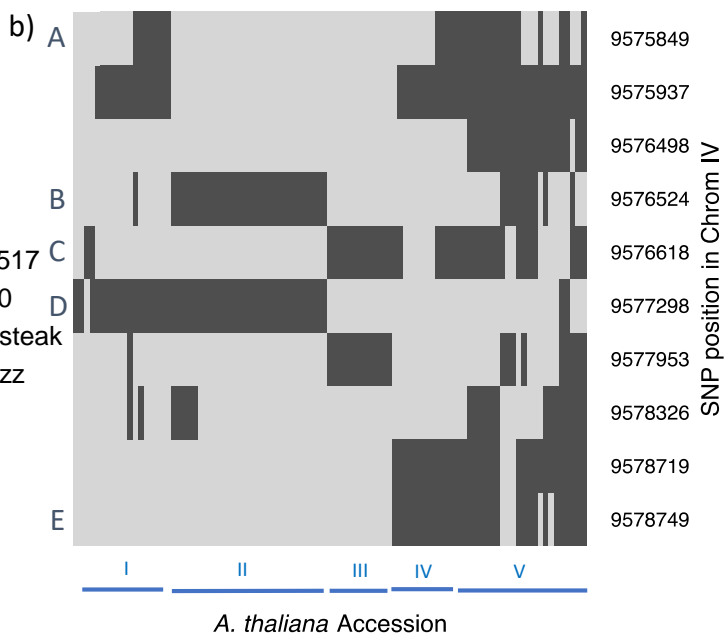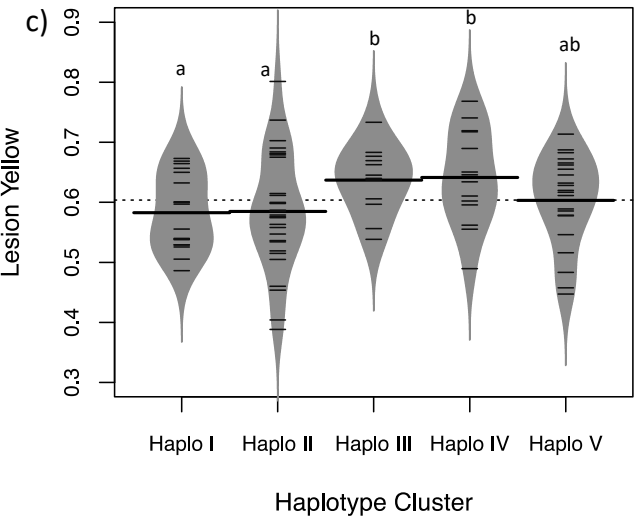

**FIGURE 6 –Haplotype diversity effects on trait to genotype linkages using AT4G17010**

a) Plot of z-scaled SNP effect size across all four *B. cinerea* isolates on lesion yellowness within 1000bp of the AT4G17010 coding region (represented in blue blocks) of AT4G17010. The arrow indicates the transcriptional start site. The horizontal orange lines indicate the permutation thresholds for the *B. cinerea* isolate Apple517. The letters show the SNPs that are significantly associated with lesion yellowness in *B. cinerea* Apple517.

b) Hierarchical clustering of 95 *A. thaliana* accessions based on SNPs within AT4G17010. Haplotypes are assigned into five major groups, denoted by Roman numerals. Light grey indicates the SNP is the Col-0 allele while dark grey is the opposite allele. The SNPs are presented in their genomic order rather than the haplotype grouped structure.

c) Distributions of lesion yellowness across the *A. thaliana* accessions infected with *B. cinerea* Apple517. The *A. thaliana* accessions are grouped by approximate SNP haplotypes in b. The model corrected mean value of lesion yellowness for *A. thaliana* reference accession Col-0 was 0.545. Significance differences between the groups are shown by letters.



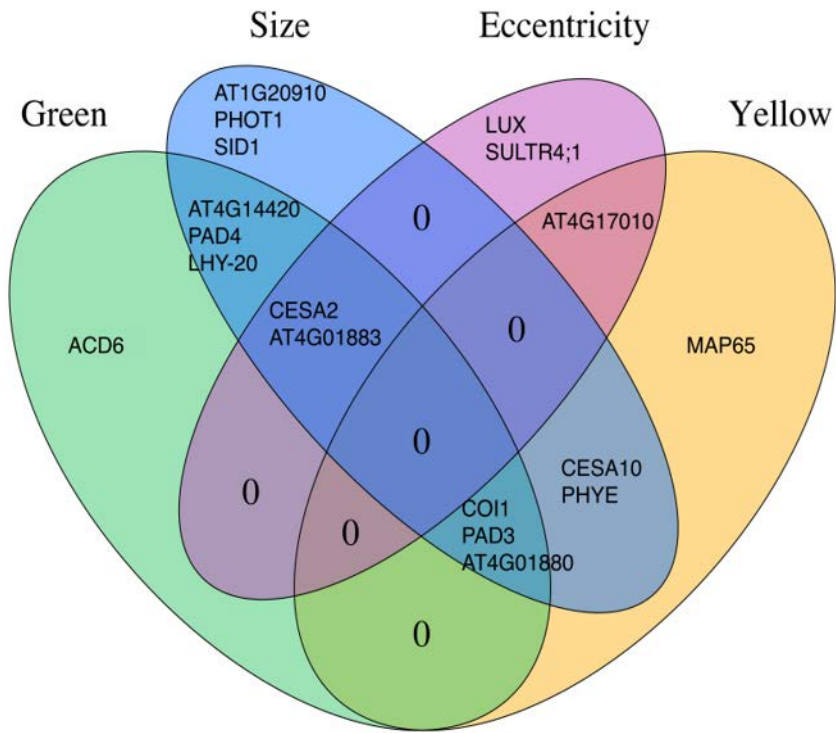

**FIGURE 7 – Lesion traits affected by T-DNA insertional mutants**

A Venn diagram showing the lesion traits significantly affected by each of the T-DNA knockout mutants in comparison to the wildtype background. The gene identifiers are located within the appropriate section of the diagram showing all the phenotypes altered by mutations in that gene.

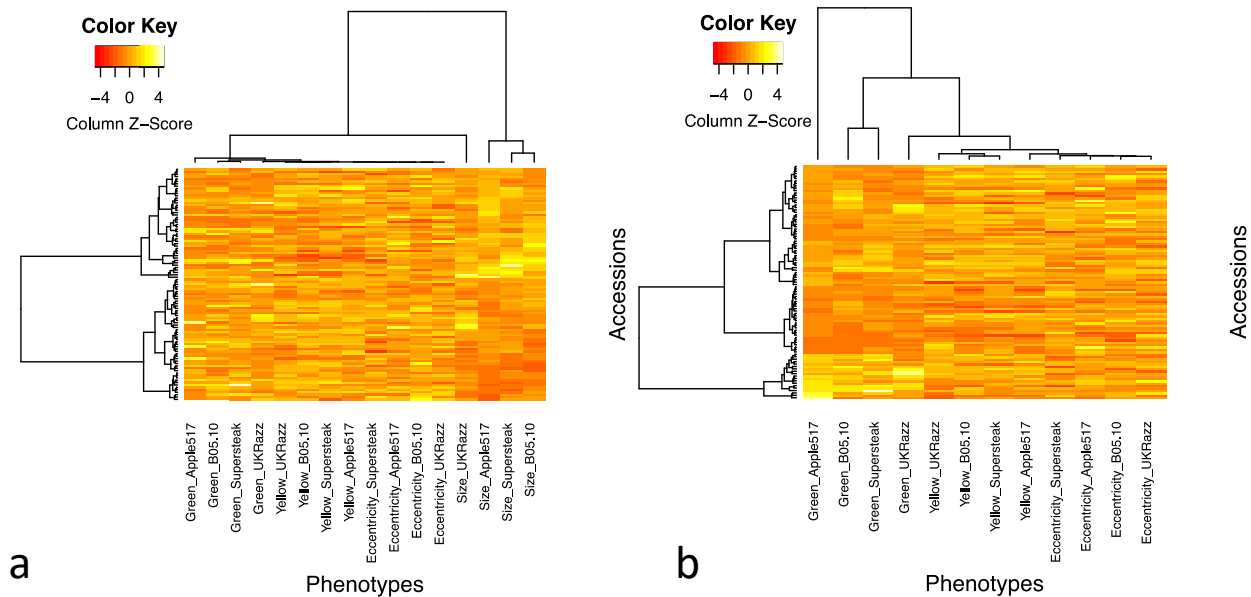

### Figure S1: Hierarchical Cluster Analysis of Lesion Traits

Hierarchical cluster analysis of the a) four traits chosen to represent broad visual aspects of lesions, across the four pathogen isolates. b) Detail showing only color and shape traits illustrates relatedness and variation across accessions and isolates.

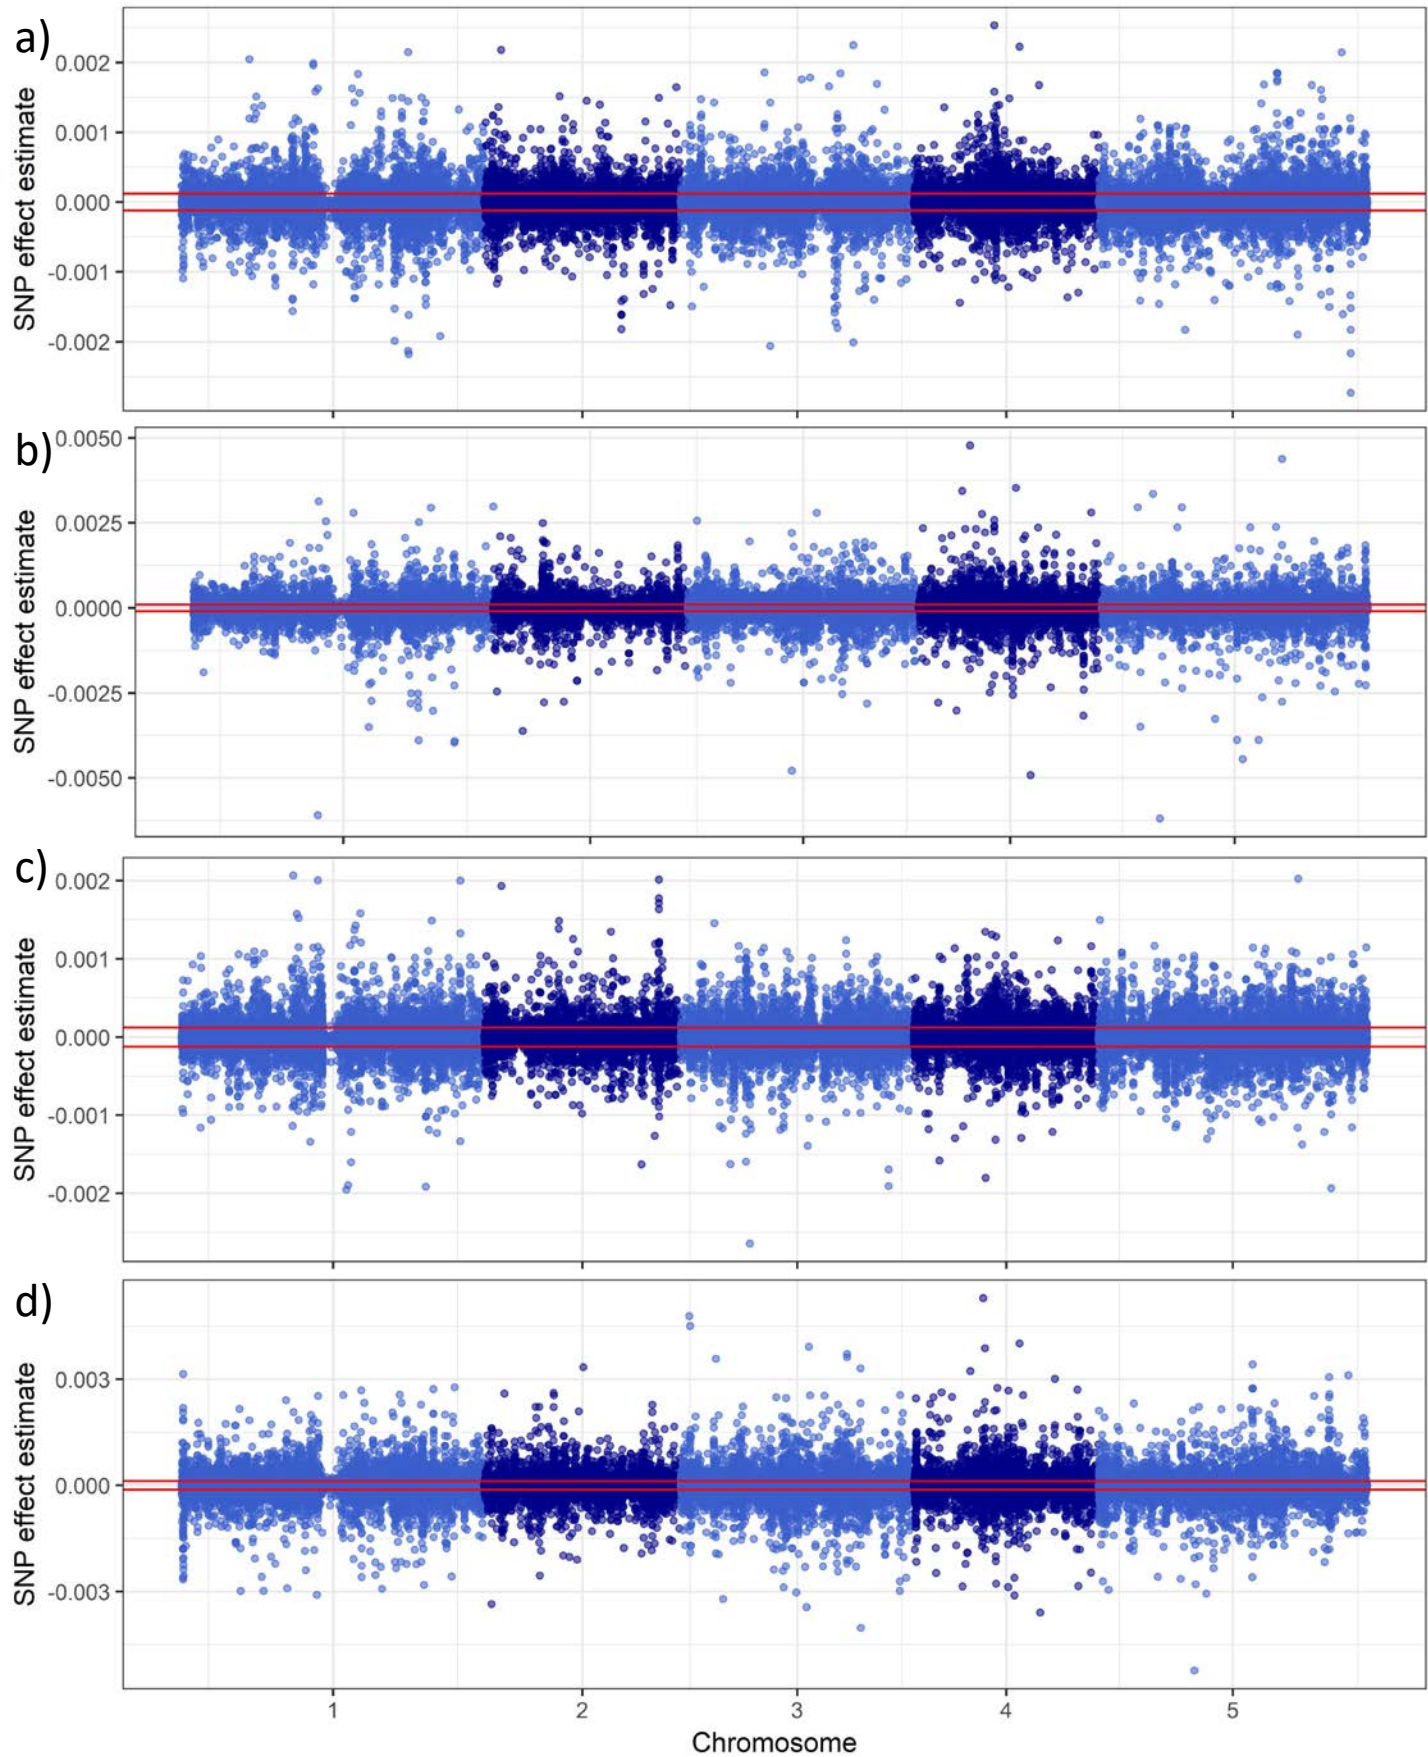

**Figure S2: Lesion Greenness Manhattan Plots**

Manhattan plots showing lesion greenness trait GWAS results, as measured on four *B. cinerea* isolates: a, Apple517; b, B05.10; c, Supersteak; and d, UKRazz. The horizontal red-line shows the significance threshold as estimated by permutation.

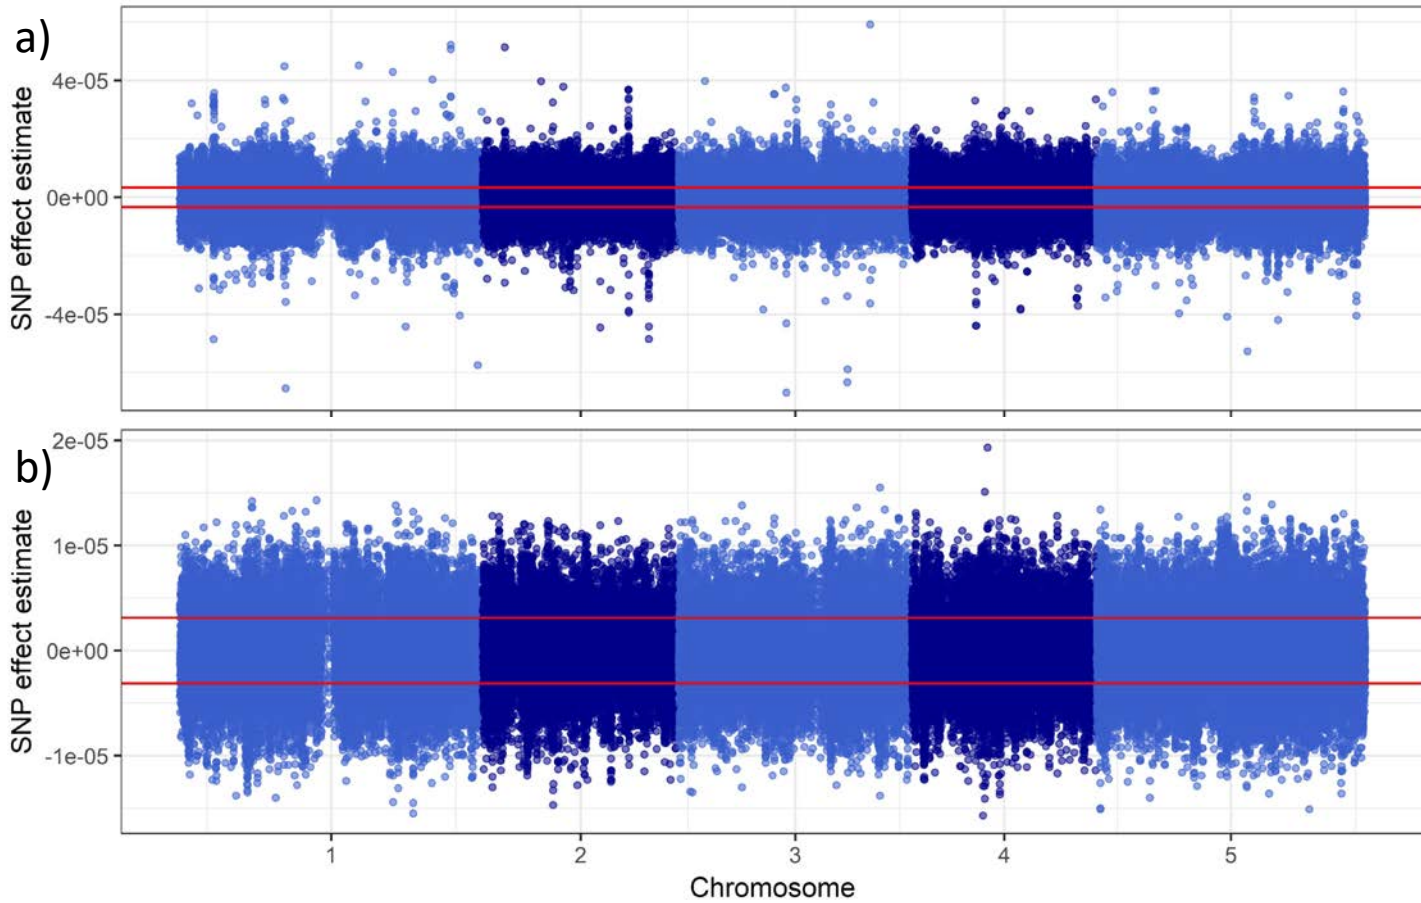

**Figure S3: Lesion Yellowness and Eccentricity Shape Manhattan Plots for Apple517**

Manhattan plots showing lesion yellowness (a) and eccentricity trait (b) GWAS results for Apple517. There were no significant SNPs identified for the other isolates. The horizontal red-line shows the significance threshold as estimated by permutation.
